1 **Miro1-dependent Mitochondrial Dynamics in Parvalbumin Interneurons**

2 **Georgina Kontou<sup>1</sup>, Pantelis Antonoudiou<sup>2</sup>, Marina Podpolny<sup>1</sup>, I. Lorena Arancibia-**  
3 **Carcamo<sup>1</sup>, Nathalie F. Higgs<sup>1</sup>, Blanka R. Szulc<sup>1</sup>, Guillermo Lopez-Domenech<sup>1</sup>, Patricia C.**  
4 **Salinas<sup>1</sup>, Edward O. Mann<sup>2,3</sup>, Josef T. Kittler<sup>1</sup>**

5 **<sup>1</sup>Department of Neuroscience, Physiology and Pharmacology, University College London,**  
6 **Gower Street, London WC1E 6BT, UK**

7 **<sup>2</sup>Department of Physiology, Anatomy and Genetics, University of Oxford, Oxford, OX1 3PT,**  
8 **UK**

9 **<sup>3</sup>Oxford Ion Channel Initiative, University of Oxford, Oxford, OX1 3PT, UK**

10

11 **SUMMARY**

12

13 The spatiotemporal distribution of mitochondria is crucial for precise ATP provision and calcium  
14 buffering required to support neuronal signaling. Fast-spiking GABAergic interneurons expressing  
15 parvalbumin (PV) have a high mitochondrial content reflecting their large energy utilization. The  
16 importance for correct trafficking and precise mitochondrial positioning remains poorly elucidated  
17 in inhibitory neurons. Miro1 is a Ca<sup>2+</sup>-sensing adaptor protein that links mitochondria to the  
18 trafficking apparatus, for their microtubule-dependent transport along axons and dendrites, in order  
19 to meet the metabolic and Ca<sup>2+</sup>-buffering requirements of the cell. Here, we explore the role of  
20 Miro1 in parvalbumin interneurons and how changes in mitochondrial trafficking could alter brain  
21 network activity. By employing live and fixed imaging, we found that the impairments in Miro1-  
22 directed trafficking in PV<sup>+</sup> interneurons altered their mitochondrial distribution and axonal  
23 arborization. These changes were accompanied by an increase in the *ex vivo* hippocampal  $\gamma$ -  
24 oscillation (30 – 80 Hz) frequency and promoted anxiolysis. Our findings show that precise  
25 regulation of mitochondrial dynamics in PV<sup>+</sup> interneurons is crucial for proper neuronal signaling  
26 and network synchronization.

27

28

## 29 INTRODUCTION

30

31 Parvalbumin (PV+) interneurons constitute a small proportion of the total neuronal population  
32 (less than 2% in the hippocampus) yet they possess crucial roles in shaping neuronal network  
33 activity (Freund and Buzsáki, 1996; Jonas et al., 2004; Pelkey et al., 2017). PV+ interneurons  
34 inhibit their postsynaptic targets efficiently by applying fast perisomatic inhibition, and have been  
35 directly implicated in the generation of network activity at the gamma ( $\gamma$ ) band frequency (30 - 80  
36 Hz) (Antonoudiou et al., 2020; Cardin et al., 2009; Hájos et al., 2004; Mann et al., 2005; Sohal et  
37 al., 2009). Network oscillations at  $\gamma$ -band frequency are believed to facilitate information  
38 transmission through circuit synchronization and local gain control that may be instrumental in  
39 multiple cognitive processes such as attention, learning and memory (Akam and Kullmann, 2010;  
40 Fries, 2015; Howard et al., 2003; Montgomery and Buzsáki, 2007; Sohal, 2016). Importantly, these  
41 oscillations are thought to be metabolically very costly and it has therefore been postulated that  
42 PV+ interneurons require substantial amounts of energy via ATP hydrolysis to sustain the high  
43 firing rate and dissipate ion gradients during neuronal transmission (Attwell and Laughlin, 2001;  
44 Kann, 2011, 2016; Kann and Kovács, 2007; Kann et al., 2014). Thus, it is crucial to understand  
45 the metabolic expenditure and the involvement of mitochondria in PV+ interneurons. Indeed,  
46 electron microscopy, histochemical and transcriptomic approaches have revealed that PV+  
47 interneurons have a higher density of energy-producing mitochondria and elevated expression  
48 levels of electron transport chain components (Adams et al., 2015; Gulyás et al., 2006; Nie and  
49 Wong-Riley, 1995; Paul et al., 2017).

50 The spatiotemporal organization of mitochondria is essential for the precise provision of ATP and  
51  $\text{Ca}^{2+}$ -buffering for neuronal transmission and communication (Devine and Kittler, 2018;

52 MacAskill and Kittler, 2010). Miro1 is a mitochondrial adaptor protein, responsible for coupling  
53 mitochondria to the cytoskeleton and for their bidirectional trafficking in axons and dendrites  
54 (Birsa et al., 2013; Guo et al., 2005; López-Doménech et al., 2016; López-Doménech et al., 2018;  
55 Macaskill et al., 2009; Nguyen et al., 2014; Saotome et al., 2008; Wang and Schwarz, 2009).  
56 Global deletion of Miro1 (encoded by the *Rhot1* gene) is perinatal lethal, while the conditional  
57 removal of Miro1 from cortical and hippocampal pyramidal cells alters the occupancy of dendritic  
58 mitochondria due to impairment in trafficking, resulting in dendritic degeneration and cell death  
59 (López-Doménech et al., 2016). In contrast, the significance of mitochondrial trafficking and  
60 distribution in PV+ interneurons, and the role of Miro1, is completely unexplored and especially  
61 interesting as their axon is highly branched with a cumulative length reaching up to 50 mm in the  
62 hippocampus (Hu et al., 2014).

63 In this study, we generated a transgenic mouse line where mitochondria are fluorescently labelled  
64 in PV+ interneurons. We crossed this line with the Miro1 floxed mouse (*Rhot1*<sup>(f/f)</sup>), to generate a  
65 model where Miro1 was conditionally knocked-out exclusively in PV+ interneurons. Using two-  
66 photon live-imaging of *ex vivo* organotypic brain slices, we demonstrated a reduction in  
67 mitochondrial trafficking in the absence of Miro1 in PV+ interneurons in the hippocampus. The  
68 impairment in Miro1-directed mitochondrial transport led to an accumulation of mitochondria in  
69 the soma and their depletion from axonal presynaptic terminals in acute hippocampal brain slices.  
70 Loss of Miro1 resulted in alterations in axonal but not dendritic branching in PV+ interneurons.  
71 This was accompanied by an increased frequency of  $\gamma$ -oscillations in hippocampal brain slices and  
72 a reduction in anxiety-related emotional behavior. Thus, we show that Miro1-dependent  
73 mitochondrial positioning is essential for correct PV+ interneuron function, network activity and  
74 anxiolytic animal behavior.

## 75 RESULTS

### 76 Loss of Miro1 in parvalbumin interneurons impairs mitochondrial trafficking

77 Mitochondrial enrichment in parvalbumin (PV+) interneurons is thought to reflect the high  
78 energetic demands of these cells (Gulyás et al., 2006). Consistent with this finding, we also  
79 observed that the protein levels of subunit IV of cytochrome c oxidase (COX-IV) were elevated in  
80 PV immuno-positive regions ( $3.6 \times 10^{-6} \pm 1.33 \times 10^{-5}$  a.u.) when compared to immuno-negative areas  
81 in hippocampal slices ( $2.8 \times 10^{-6} \pm 1.26 \times 10^{-5}$  a.u., **Fig 1A**,  $p < 0.0001$ ), further supporting that PV+  
82 interneurons heavily rely on mitochondria. Yet, mitochondrial dynamics in PV+ interneurons have  
83 not been explored. To specifically examine the role of mitochondrial transport in PV+  
84 interneurons, we disrupted the mitochondrial adaptor protein Miro1 by crossing the PV<sup>Cre</sup> mouse  
85 line with the *Rhot1*<sup>(fl/fl)</sup> mouse (López-Doménech et al., 2016), thus generating a model where  
86 Miro1 was selectively knocked-out in PV+ interneurons (**Supplementary Fig 1A**). We then  
87 crossed this PV<sup>Cre</sup> *Rhot1*<sup>(fl/fl)</sup> line with a transgenic mouse where mitochondria expressed the  
88 genetically encoded Dendra2 fluorophore (MitoDendra) (Pham et al., 2012) (**Supplementary Fig**  
89 **1A**), allowing for the visualization of mitochondria selectively in PV+ interneurons  
90 (**Supplementary Fig 1B**). Thus, we generated a mouse where Miro1 was knocked-out and  
91 mitochondria were fluorescently labelled selectively in PV+ interneurons (**Supplementary Fig**  
92 **1C**). Gene expression under the PV+ promoter begins around P10 and is stabilized around P28  
93 (Barnes et al., 2015). Thus, Cre-dependent removal of Miro1 is not expected to impact on the  
94 migration, differentiation and viability of PV+ neurons (Okaty et al., 2009; del Río et al., 1994).  
95 The Miro1 fluorescence intensity was significantly reduced in brain slices from the knock-out  
96 mouse, confirming the selective removal of Miro1 from PV+ interneurons (Miro<sup>(+/Δ)</sup>  $844 \pm 32.8$   
97 a.u., Miro<sup>(Δ/Δ)</sup>  $518 \pm 20.5$  a.u. **Supplementary Fig 1D**,  $p < 0.0001$ ). These immunohistochemical

98 experiments demonstrate that the PV<sup>Cre</sup> *Rhot1*<sup>(fl/fl)</sup> MitoDendra mouse can be utilized to examine  
99 mitochondria dynamics in parvalbumin interneurons in a system where Miro1 is absent.

100 Next, we wanted to investigate the contribution of Miro1 to mitochondrial trafficking in PV+  
101 interneurons. We therefore performed two-photon live-imaging in intact organotypic brain tissue  
102 (at 7-9 days *in vitro*) from neonatal (P6-8) control (Miro1<sup>(+/+)</sup>), hemi-floxed (Miro1<sup>(+/ $\Delta$ )</sup>) and  
103 conditional knock-out (Miro1<sup>( $\Delta$ / $\Delta$ )</sup>) animals (**Fig 1B**). Consistent with other models where Miro1  
104 is knocked-out (López-Doménech et al., 2016; Nguyen et al., 2014), we found a significant  
105 reduction in the percentage of moving mitochondria in the absence of Miro1 when compared to  
106 the control (Miro1<sup>(+/+)</sup> 23 ± 3%, Miro1<sup>(+/ $\Delta$ )</sup> 21 ± 2%, Miro1<sup>( $\Delta$ / $\Delta$ )</sup> 9 ± 3%, **Fig 1C**,  $p_{\text{Miro1}(+/\Delta)} = 0.939$ ,  
107  $p_{\text{Miro1}(\Delta/\Delta)} = 0.002$ ). Even though the moving mitochondria exhibited similar velocities in the three  
108 conditions (Miro1<sup>(+/+)</sup> 0.17 ± 0.018  $\mu\text{m/s}$ , Miro1<sup>(+/ $\Delta$ )</sup> 0.14 ± 0.007  $\mu\text{m/s}$ , Miro1<sup>( $\Delta$ / $\Delta$ )</sup> 0.15 ± 0.016  
109  $\mu\text{m/s}$ , **Fig 1D**,  $p_{\text{Miro1}(+/\Delta)} = 0.229$ ,  $p_{\text{Miro1}(\Delta/\Delta)} = 0.557$ ), the length of the travelled trajectory was  
110 significantly shorter in Miro1<sup>(+/ $\Delta$ )</sup> (31 ± 2.7  $\mu\text{m}$ ) and Miro1<sup>( $\Delta$ / $\Delta$ )</sup> (35 ± 3.8  $\mu\text{m}$ ) when compared to  
111 the control (49 ± 2.0  $\mu\text{m}$ , **Fig 1E**,  $p_{\text{Miro1}(+/\Delta)} < 0.0001$ ,  $p_{\text{Miro1}(\Delta/\Delta)} = 0.024$ ). This experiment  
112 demonstrates that the presence of Miro1 is critical for mitochondrial trafficking in PV+  
113 interneurons.

#### 114 **Loss of Miro1 in parvalbumin interneurons results in mitochondrial accumulation in the** 115 **soma and depletion from axonal presynaptic terminals**

116 Given that Miro1 is a crucial component of the mitochondrial transport machinery in PV+ cells,  
117 we wanted to investigate the effect of impaired trafficking on mitochondrial localization in PV+  
118 interneurons, *ex vivo*. We noticed that mitochondria accumulated in the cell bodies of PV+  
119 interneurons depleted of Miro1 in hippocampal sections from adult mice (**Fig 2A**). The number of

120 PV immuno-positive cells that contained mitochondrial accumulations in the soma was  
121 significantly increased when Miro1 was knocked-out ( $58 \pm 5.7\%$ ), compared to control ( $11 \pm 3.1\%$ ,  
122 **Fig 2B**,  $p < 0.0001$ ). This is consistent with the somatic mitochondrial accumulations that have also  
123 been reported in pyramidal cells in the CaMK-II<sup>Cre</sup> *Rhot1*<sup>(fl/fl)</sup> model (López-Doménech et al., 2016)  
124 and are presumably due to the inefficient trafficking of mitochondria out to the neurites of the cell.  
125 The mitochondria in the Miro1<sup>(Δ/Δ)</sup> occupied a smaller area relative to the cell body (Miro1<sup>(+/Δ)</sup>  $39$   
126  $\pm 1.0\%$ , Miro1<sup>(Δ/Δ)</sup>  $28 \pm 1.0\%$ ) and seem to be concentrated around the nucleus when Miro1 was  
127 knocked-out (**Fig 2C**,  $p < 0.0001$ ). Together, these data suggest that the spatial distribution of  
128 mitochondria is altered in PV+ interneurons in the absence of Miro1.

129 To further understand the impact of impaired Miro1-dependent mitochondrial trafficking in PV+  
130 interneurons, we looked at the organization of mitochondria in the axons and dendrites of PV+  
131 cells. MitoDendra+ cells were biocytin-filled allowing for the morphological visualization of  
132 individual PV+ interneurons in acute brain slices (**Fig 2D**). Biocytin was uniformly diffused along  
133 dendrites and accumulated in the axon allowing for the identification of distinct presynaptic  
134 boutons (**Fig 2E, 2F**) (Swietek et al., 2016). We observed that  $74 \pm 4.1\%$  of presynaptic terminals  
135 contained MitoDendra+ mitochondria in control cells (**Fig 2F, 2G**). This is consistent with  
136 literature where approximately 75% of PV+ axonal boutons are enriched with mitochondria, and  
137 this is in contrast to pyramidal cells where less than half are associated with mitochondria (Glausier  
138 et al., 2017; Kwon et al., 2016; Smith et al., 2016; Vaccaro et al., 2017). However, we report a  
139 marked reduction in the axonal presynaptic terminals that contained mitochondria in the cells  
140 where Miro1 was knocked-out ( $51 \pm 4.0\%$ , **Fig 2G**,  $p = 0.003$ ). The distribution along the axon  
141 (occupancy) and size of boutons were unaffected by the loss of Miro1 (**Fig 2H, 2I**). The minimum  
142 normalised distance between boutons and mitochondria was increased in Miro1<sup>(Δ/Δ)</sup> PV+

143 interneurons ( $1.6 \pm 0.1$  a.u.) when compared to Miro1<sup>(+/+)</sup> ( $1 \pm 0.1$  a.u.) suggesting that  
144 mitochondria might no longer be captured in the presynapse as they are found further away from  
145 the axonal terminals (**Fig 2J**,  $p = 0.0001$ ). These data indicate that defects in Miro1-directed  
146 mitochondrial trafficking are sufficient to shift the mitochondrial distribution along the axon,  
147 leading to a depletion of mitochondria away from axonal presynaptic boutons, *in vivo*.

### 148 **Loss of Miro1 in PV+ interneurons results in an enrichment of mitochondria close to axonal** 149 **branching sites and an increase in axonal branching**

150 Our data suggest that the impairment in Miro1-dependent trafficking altered the precise  
151 mitochondrial positioning in PV+ interneuron axons. To examine whether this alteration could  
152 result in a structural change in PV+ interneuron morphology due to a reorganization of the  
153 mitochondrial network in the absence of Miro1, we used the biocytin fill to generate a neuronal  
154 reconstruction (**Fig 3A**). The total length of PV+ interneuron dendrite and axon did not differ  
155 between control and conditional knock-out cells (**Fig 3B**). We noticed an increase in the number  
156 of processes in Miro1<sup>( $\Delta\Delta$ )</sup> cells ( $506 \pm 34$  processes) when compared to Miro1<sup>(+/+)</sup> ( $376 \pm 46$   
157 processes, **Fig 3C**,  $p = 0.042$ ) and a trend towards an increase in the number of branches between  
158 Miro1<sup>(+/+)</sup> ( $342 \pm 42$  branches) and Miro1<sup>( $\Delta\Delta$ )</sup> conditions ( $465 \pm 35$  branches, **Fig 3D**,  $p = 0.052$ ).  
159 We further investigated whether the increase in processes was attributed to a selective increase in  
160 the branches of axons or dendrites in the absence of Miro1. By visually assessing and  
161 independently labelling axons and dendrites during the reconstruction process, we isolated the  
162 contribution of each compartment to the total number of branches. Interestingly, there was a  
163 selective increase in axonal (**Fig 3F, 3H**) but not dendritic branching (**Fig 3E, 3G**) in Miro1<sup>( $\Delta\Delta$ )</sup>  
164 ( $427 \pm 32$  branches) when compared to Miro1<sup>(+/+)</sup> ( $296 \pm 38$  branches, **Fig 3F**,  $p = 0.031$ ). By  
165 performing Sholl analysis and plotting the number of intersections as a function of the distance

166 from the soma in Miro1<sup>(+/+)</sup> and Miro1<sup>(Δ/Δ)</sup> cells, we noticed an enhancement in axonal branching  
167 in the proximal axon (between 50 μm and 200 μm from the cell body) when Miro1 was knocked-  
168 out (**Fig 3H**). By using the neuronal reconstruction as a mask, we isolated the MitoDendra+  
169 mitochondrial network in individual PV+ interneurons and compared the mitochondrial  
170 organization in control and knock-out cells. Sholl analysis revealed a shift in mitochondrial  
171 distribution proximal to the soma in Miro1<sup>(Δ/Δ)</sup> cells (**Fig 3J**). We quantified the minimum  
172 normalised distance between branch points and mitochondria (**Fig 3I**) in Miro1<sup>(+/+)</sup> ( $1 \pm 0.06$  a.u.)  
173 and Miro1<sup>(Δ/Δ)</sup> ( $0.7 \pm 0.04$  a.u.) and found a decrease in the absence of Miro1 (**Fig 3K**,  $p = 0.0003$ ).  
174 Additionally, the probability of encountering a mitochondrion within 1 μm from the branch point  
175 is higher in the Miro1<sup>(Δ/Δ)</sup> ( $P = 0.49$ ) when compared to the control condition ( $P = 0.31$ ) (data not  
176 shown). Thus, the loss of Miro1-directed trafficking not only shifted mitochondria away from the  
177 presynapse but also placed them closer to locations of axonal branching. The close proximity of  
178 mitochondria to axonal branching points in the absence of Miro1 suggests roles for their  
179 involvement in driving the formation of axonal segments.

### 180 **Loss of Miro1-dependent mitochondrial positioning does not alter parvalbumin interneuron** 181 **mediated inhibition**

182 We next wanted to address whether the alterations in mitochondrial localisation due to impaired  
183 trafficking could affect parvalbumin interneuron function and their ability to apply fast perisomatic  
184 inhibition in the absence of Miro1. To do that, we recorded the spontaneous inhibitory postsynaptic  
185 currents (sIPSCs) that pyramidal cells received in the hippocampus in acute brain slices from  
186 Miro1<sup>(+/+)</sup> and Miro1<sup>(Δ/Δ)</sup> animals (**Supplementary Fig 2A**). Neither the frequency of the sIPSCs,  
187 represented as the inter event interval, nor the amplitude of the responses were different between  
188 the two conditions (**Supplementary Fig 2B, 2C**), suggesting that the loss of Miro1 did not lead to



189 an alteration in inhibitory synaptic transmission. The recorded sIPSCs however could contain the  
190 inhibitory contribution of other interneurons in the network. To specifically assess the PV+  
191 interneuron mediated inhibition, we generated a mouse model where PV+ interneurons could be  
192 temporally controlled by the light-induced activation (photoactivation) of channel rhodopsin 2  
193 (ChR2) (**Supplementary Fig 2D, 2E**). We then photoactivated PV+ interneurons (1ms pulse  
194 width, 30 repetitions per cell) and quantified the mean evoked IPSCs (eIPSCs) neighbouring  
195 pyramidal cells received in the hippocampus (**Supplementary Fig 2E, 2F**). We found that there  
196 was no change in the amplitude (**Supplementary Fig 2G**), charge transfer (**Supplementary Fig**  
197 **2H**), and decay (**Supplementary Fig 2I**) between control and Miro1<sup>(ΔΔ)</sup> conditions. These data  
198 strongly suggest that the PV+ interneuron ability to apply perisomatic inhibition is unaffected by  
199 the loss of Miro1 and subsequent changes in mitochondrial dynamics. We also tested whether PV+  
200 cells could sustain inhibition and recover after long-lasting light-activation (**Supplementary Fig**  
201 **2J**). We presented a 2 second light train stimulation (40 Hz; 1ms pulse width) that was repeated  
202 10 times and recorded the eIPSCs from neighbouring pyramidal cells. In order to assess whether  
203 the cells recovered in a similar manner after the photo-stimulation, we presented one light pulse at  
204 increasing time intervals at the end of every train and measured the eIPSC response. There was no  
205 difference in neither the amplitude of the inhibitory currents received by pyramidal cells during  
206 the 2 second stimulation (**Supplementary Fig 2K**) nor in the recovery of post-light train pulses.  
207 Thus, Miro1-dependent mitochondrial positioning does not seem to alter the synaptic properties  
208 of PV+ cells and may not be important for short term recovery of the inhibitory responses either,  
209 as control and knock-out cells behave similarly (**Supplementary Fig 2L**). In conclusion, the loss  
210 of Miro1 does not seem to alter inhibitory properties of PV+ interneurons in the hippocampus of  
211 two month old animals.

212 **Parvalbumin interneurons receive increased excitatory inputs when Miro1 is conditionally**  
213 **knocked-out**

214 Next, we sought to understand whether the loss of Miro1 and subsequent changes in mitochondrial  
215 dynamics alter the intrinsic features of PV+ interneurons. We recorded the intrinsic properties of  
216 PV+ interneurons in Miro1<sup>(+/+)</sup>, Miro1<sup>(+/ $\Delta$ )</sup> and Miro1<sup>( $\Delta$ / $\Delta$ )</sup> slices by applying depolarising and  
217 hyperpolarising pulses (**Supplementary Fig 3A**). We observed no difference in action potential  
218 (AP) peak amplitude (**Supplementary Fig 3B**), input resistance (**Supplementary Fig 3E**),  
219 threshold to fire (**Supplementary Fig 3F**), and spike rate at 40 pA above rheobase current  
220 (**Supplementary Fig 3D**) in the three conditions. The AP half-width was slightly higher in  
221 Miro1<sup>(+/+)</sup> ( $0.4 \pm 0.03$  ms) when compared to Miro1<sup>(+/ $\Delta$ )</sup> ( $0.3 \pm 0.02$  ms) and Miro1<sup>( $\Delta$ / $\Delta$ )</sup> ( $0.3 \pm 0.02$   
222 ms) recordings (**Supplementary Fig 3C**,  $p_{\text{Miro1}(+/\Delta)} = 0.048$ ,  $p_{\text{Miro1}(\Delta/\Delta)} = 0.864$ ). The membrane  
223 time constant was slightly decreased in Miro1<sup>(+/ $\Delta$ )</sup> ( $8 \pm 0.8$  ms) and Miro1<sup>( $\Delta$ / $\Delta$ )</sup> ( $8 \pm 0.6$  ms) animals  
224 when compared to control ( $12 \pm 2.0$  ms, **Supplementary Fig 3G**,  $p_{\text{Miro1}(+/\Delta)} = 0.073$ ,  $p_{\text{Miro1}(\Delta/\Delta)} =$   
225  $0.046$ ). We speculate that although the differences in intrinsic properties were small, the loss of  
226 Miro1 from PV+ interneurons might potentially result in shorter integration time and faster  
227 response to excitatory inputs. The change in membrane time constant could also potentially reflect  
228 the changes to the morphology of the cell (Isokawa, 1997).

229 In order to investigate whether PV+ interneurons received differential synaptic inputs, we  
230 performed whole-cell recordings and acquired the spontaneous excitatory postsynaptic currents  
231 (sEPSCs) in the hippocampus of acute brain slices (**Fig 4G**). The sEPSC frequency was  
232 significantly increased, as shown by the decrease in the mean inter-event interval (IEI) between  
233 Miro1<sup>(+/+)</sup> ( $0.03 \pm 0.009$  s) and Miro1<sup>( $\Delta$ / $\Delta$ )</sup> ( $0.02 \pm 0.003$  s) cells (**Fig 4H**,  $p = 0.025$ ). Additionally,  
234 the amplitude of sEPSCs was elevated in Miro1<sup>( $\Delta$ / $\Delta$ )</sup> ( $-188 \pm 17.2$  pA) slices when compared to

235 control slices ( $-130 \pm 7.8$  pA, **Fig 4I**,  $p = 0.0097$ ). Thus, the increase in sEPSC frequency and  
236 amplitude suggest that PV+ interneurons receive an enhanced excitatory drive when Miro1 was  
237 knocked-out.

### 238 **Alterations in Miro1-dependent mitochondrial positioning change hippocampal network** 239 **activity and anxiety-related animal behavior**

240 We then sought to examine whether the Miro1-dependent alterations in mitochondrial distribution  
241 could result in altered neuronal network activity. Given that  $\gamma$ -oscillations are energetically very  
242 costly (Kann et al., 2014) and depend on proper PV+ interneuron function, we wanted to see  
243 whether the loss of Miro1 could have an impact on the ability of PV+ cells to synchronize neuronal  
244 networks. We measured carbachol induced  $\gamma$ -oscillations in the CA3 area of the hippocampus by  
245 recording local field potentials in acute brain slices of Miro1<sup>(+/+)</sup>, Miro1<sup>(+/ $\Delta$ )</sup> and Miro1<sup>( $\Delta$ / $\Delta$ )</sup> animals  
246 (**Fig 4A, 4B**). Even though the peak power and power area were not significantly different (**Fig**  
247 **4D, 4E**), we found a small but significant increase in the peak frequency of the oscillations that  
248 appeared to be gene-dose dependent between the different genotypes (Miro1<sup>(+/+)</sup>  $31 \pm 0.6$  Hz,  
249 Miro1<sup>(+/ $\Delta$ )</sup>  $35 \pm 0.6$  Hz, Miro1<sup>( $\Delta$ / $\Delta$ )</sup>  $37 \pm 0.9$  Hz, **Fig 4C**,  $p_{\text{Miro1}(+/\Delta)} = 0.004$ ,  $p_{\text{Miro1}(\Delta/\Delta)} < 0.0001$ ). We  
250 then quantified the 50% width of the power spectrum distribution as a measure of the oscillation  
251 variability (**Fig 4F**). We noticed that the distribution was significantly broader in Miro1<sup>(+/ $\Delta$ )</sup> ( $8 \pm$   
252  $0.6$ ) and Miro1<sup>( $\Delta$ / $\Delta$ )</sup> ( $9 \pm 0.9$ ) when compared to control ( $5 \pm 0.7$ ), suggesting increased variability  
253 of the  $\gamma$ -cycle duration (**Fig 4F**,  $p_{\text{Miro1}(\Delta/\Delta)} = 0.005$ ). These data demonstrate that the loss of Miro1  
254 and subsequent changes in mitochondrial trafficking and distribution in PV+ interneurons are  
255 sufficient to alter hippocampal network activity, further involving mitochondria in the modulation  
256 of *ex vivo*  $\gamma$ -oscillations (Inan et al., 2016; Kann, 2011; Kann et al., 2011).

257 Finally, we wanted to see whether the loss of Miro1 from PV+ interneurons was sufficient to  
258 induce functional changes in the behavior of these animals. We observed no changes in husbandry  
259 behavior (**Supplementary Fig 4A**) assessed by the shredding of Nestlets (Deacon, 2006), motor  
260 coordination and learning (**Supplementary Fig 4B**) on the rotarod (Deacon, 2013) and short-term  
261 memory (**Supplementary Fig 4C**) in the T-Maze (Deacon and Rawlins, 2006). We also did not  
262 observe a robust difference in spatial exploration of Miro1<sup>(+/+)</sup> and Miro1<sup>(Δ/Δ)</sup> animals in the open  
263 field assessment (**Supplementary Fig 4D**) (Seibenhener and Wooten, 2015). The velocity  
264 (**Supplementary Fig 4E**), distance travelled (**Supplementary Fig 4F**), and time spent in the areas  
265 of the arena (**Supplementary Fig 4G**) were not statistically different between the two genotypes.  
266 Finally, we tested anxiety-like behavior of littermate control and conditional knock-out animals in  
267 the elevated plus maze (EPM) (**Fig 4J**). As expected, both Miro1<sup>(+/+)</sup> and Miro1<sup>(Δ/Δ)</sup> mice spent the  
268 majority of time in the closed arms due to the natural aversive behavior to light. The Miro1<sup>(Δ/Δ)</sup>  
269 animals however spent more time in the open arms ( $18 \pm 5\%$ ) than their littermate controls ( $6 \pm$   
270  $1\%$ , **Fig 4K**,  $p = 0.004$ ). The performance of Miro1<sup>(Δ/Δ)</sup> animals in the EPM suggests that they may  
271 exhibit a reduced anxiety-like phenotype. In conclusion, the selective loss of Miro1 from  
272 parvalbumin interneurons results in changes in mitochondrial dynamics, axonal remodeling and  
273 network activity that might give rise to anxiety related phenotypes, affecting the behavior of these  
274 animals.

275

276

277

278

## 279 DISCUSSION

280 In this study, we demonstrate that the conditional removal of Miro1 in PV+ cells resulted in a  
281 mitochondrial trafficking impairment. Furthermore, the loss of Miro1 led to an accumulation of  
282 mitochondria in the soma of PV+ cells and their depletion from axonal presynaptic terminals. The  
283 relocation of mitochondria closer to sites of axonal branching was associated with a selective  
284 enrichment in axonal branches proximal to the cell body. Interestingly, these animals also  
285 exhibited faster  $\gamma$ -oscillations and a reduced anxiety-like phenotype. Our data suggest that Miro1-  
286 dependent mitochondrial positioning is implicated in shaping hippocampal network activity and  
287 animal behavior.

288 The enrichment of mitochondria in PV+ interneurons denotes their important role in the correct  
289 function of these neurons (Gulyás et al., 2006; Inan et al., 2016; Lin-Hendel et al., 2016; Paul et  
290 al., 2017). Our immunohistochemical data also demonstrate that PV+ interneurons display  
291 increased levels of the subunit IV of cytochrome c oxidase (COX-IV) (**Fig 1A**). This is consistent  
292 with evidence proposing high levels of oxidative phosphorylation proteins such as complex I,  
293 cytochrome C oxidase, cytochrome C and ATP synthase in these cells (Gulyás et al., 2006; Kann  
294 et al., 2011; Paul et al., 2017). This observation could further support the notion that PV+  
295 interneurons are metabolically more active to meet their high energy demands and suggests that  
296 stringent dependence on mitochondrial function could render PV+ interneurons susceptible to  
297 incidents of mitochondrial damage.

298 The generation of the PV<sup>Cre</sup> *Rhot1*<sup>(fl/fl)</sup> MitoDendra transgenic mouse permitted the visualization  
299 of mitochondria and the conditional removal of Miro1 specifically in PV+ cells (**Supplementary**  
300 **Fig 1**). Given the role of the adaptor protein Miro1 in the bidirectional trafficking of mitochondria

301 to locations of high energy demand (Birsa et al., 2013; Guo et al., 2005; López-Doménech et al.,  
302 2016; López-Doménech et al., 2018; Macaskill et al., 2009; Nguyen et al., 2014; Saotome et al.,  
303 2008; Wang and Schwarz, 2009), we examined the importance of correct mitochondrial transport  
304 in PV+ interneurons. The conditional removal of Miro1 resulted in a decrease in mitochondrial  
305 trafficking, consistent with the functional role of Miro1 (**Fig 1B**). A small subset of mitochondria  
306 remained mobile in the absence of Miro1, indicating that mitochondrial transport was not  
307 completely abolished in Miro1<sup>(Δ/Δ)</sup>. Other studies also report a reduction, but not complete  
308 cessation of mitochondrial transport, upon Miro1 loss (López-Doménech et al., 2016; Macaskill  
309 et al., 2009; Russo et al., 2009), hinting to the existence of alternative mitochondrial transport  
310 mechanisms. The physical attachment of mitochondria to other motor-adaptor proteins might still  
311 facilitate organelle transport. Our lab has demonstrated that Trak1/2 motors can still be recruited  
312 to the mitochondria in mouse embryonic fibroblasts (MEFs), in a Miro1-independent fashion  
313 (López-Doménech et al., 2018). The mobile mitochondria in PV+ interneurons exhibited shorter  
314 travelled trajectories in Miro1<sup>(Δ/Δ)</sup> (**Fig 1E**). Thus, it is also possible that the remaining moving  
315 mitochondria engaged with cytoskeletal elements other than microtubules. Indeed, involvement of  
316 the actin cytoskeleton has been implicated in short-range mitochondrial movement (Chada and  
317 Hollenbeck, 2004; Morris and Hollenbeck, 1995). Still, the remaining moving mitochondria in our  
318 model exhibited directional, rather than random movement, which favors transport along  
319 microtubules.

320 The loss of Miro1 from PV+ interneurons resulted in a mitochondrial accumulation in the cell  
321 bodies suggesting that mitochondria are no longer able to exit the soma due to impaired  
322 mitochondrial trafficking (**Fig 2A**). Similar perinuclear clustering has also been reported upon the  
323 loss of Miro1 in MEFs (López-Doménech et al., 2018; Nguyen et al., 2014) and in the CaMK-II<sup>Cre</sup>

324 *Rhot1*<sup>(fl/fl)</sup> mouse at four months of age (López-Doménech et al., 2016). The loss of Miro1-directed  
325 mitochondrial transport was accompanied by a redistribution in the mitochondrial network in PV+  
326 interneurons. While the majority of PV+ axonal boutons contain mitochondria (**Fig 2G**), loss of  
327 Miro1 resulted in their depletion from these sites (**Fig 2F**), suggesting a role for Miro1 in  
328 mitochondrial capture in presynaptic terminals along the PV+ interneuron axon. Mutations in  
329 dMiro, the drosophila orthologue, impair mitochondrial trafficking and deplete mitochondria from  
330 the axon, altering the morphology of both the axon and synaptic boutons in the neuromuscular  
331 junction (Guo et al., 2005). Miro1 also mediates the activity-dependent repositioning of  
332 mitochondria to synapses in excitatory neurons (Vaccaro et al., 2017). Collectively, this evidence  
333 proposes a role for Miro1-directed mitochondrial trafficking in the fine tuning of presynaptic  
334 mitochondrial occupancy. We speculate that the loss of mitochondria from axonal terminals in  
335 Miro1<sup>(Δ/Δ)</sup> could be the consequence of defective protein-protein interactions with the tethering  
336 machinery, resulting in the inability of mitochondria to be retained in the presynaptic space.  
337 Mitochondrial transport on actin filaments mediates local distribution along the axon  
338 and destabilisation of F-actin reduces mitochondrial docking (Chada and Hollenbeck, 2003, 2004;  
339 Hirokawa et al., 2010; Shlevkov et al., 2019; Smith and Gallo, 2018). It is therefore possible that  
340 the loss of Miro1 might have disrupted the interaction between mitochondria and the actin  
341 cytoskeleton resulting in reduced presynaptic capture for example due to impairments in the  
342 Myo19-dependent coupling to actin in the absence of Miro1 (López-Doménech et al., 2018).

343 Neuronal mitochondrial misplacement is thought to impact on neuronal morphology as  
344 mitochondria are no longer precisely located in places where they are actively required to provide  
345 energy and buffer calcium (Devine and Kittler, 2018; Guo et al., 2005; Liu and Shio, 2008; López-  
346 Doménech et al., 2016). By reconstructing the morphology of PV+ interneurons in brain slices

347 (**Fig 3A**), we reported a selective enrichment in axonal but not dendritic branching, proximal to  
348 the cell soma upon loss of Miro1 (**Fig 3H**). Interestingly, the loss of Miro1-directed mitochondrial  
349 trafficking and depletion of mitochondria from axonal boutons were accompanied by a general  
350 shift in the mitochondrial distribution closer to the soma (**Fig 3J**). Since mitochondria were found  
351 closer to sites of branch points in the absence of Miro1, our data suggest that the enhancement in  
352 axonal branching could be attributed to the perturbed mitochondrial distribution (**Fig 3I**).  
353 Mitochondrial arrest and presynaptic capture is necessary for axon extension and branching  
354 formation, as mitochondria can locally provide energy (Courchet et al., 2013; Sainath et al., 2017;  
355 Smith and Gallo, 2018; Spillane et al., 2013). The extension and retraction of the axon are  
356 developmentally dynamic processes (Chattopadhyaya et al., 2004, 2007; Huang et al., 2007) and  
357 the Miro1-dependent changes in mitochondrial distribution could promote either the formation of  
358 branches close to the cell body and/or the reorganization of existing branches.

359 We then examined whether the spatiotemporal regulation of mitochondrial positioning could  
360 impact on PV+ interneuron function and network activity. PV+ interneurons are critical elements  
361 in generating and maintaining  $\gamma$ -oscillations (Antonoudiou et al., 2020; Bartos et al., 2007; Buzsáki  
362 and Wang, 2012; Cardin et al., 2009; Sohal et al., 2009) and these oscillations heavily rely on  
363 intact mitochondrial function (Galow et al., 2014; Huchzermeyer et al., 2008, 2013, Kann et al.,  
364 2011, 2016; Whittaker et al., 2011). Indeed, pharmacological inhibition of complex I with  
365 rotenone, and uncoupling of oxidative phosphorylation with FCCP abolishes the power of  $\gamma$ -  
366 oscillations (Whittaker et al., 2011) while rotenone also reduced oxygen consumption in the CA3  
367 area of the hippocampus, coupling respiration to network activity (Kann et al., 2011). By recording  
368 carbachol-induced rhythmic network activity in the CA3 area of the hippocampus, we reported a  
369 mild increase in the frequency and variability of  $\gamma$ -oscillations in a Miro1 dose dependent manner



370 (Fig 4C). These results suggest that in addition to the proper functioning of mitochondria, their  
371 precise positioning along the axon might be important in the fine tuning of rhythmic oscillations  
372 in  $\gamma$ -frequency band. The width of the power spectra was wider when Miro1 was knocked-out from  
373 PV+ interneurons (Fig 4F), suggesting higher variability in the duration of  $\gamma$ -cycles. Alterations in  
374 axonal branching could have an implication on the innervation of postsynaptic targets (Huang et  
375 al., 2007) and it is therefore possible that the precise PV+ interneuron innervation of pyramidal  
376 cells changed (Fig 3H), resulting in an increase in the excitation PV+ interneurons received in the  
377 hippocampus (Fig 4G, H). We speculate that the extent of the axon reach in the hippocampus  
378 might be reduced resulting in each PV+ interneuron inhibiting a different number of postsynaptic  
379 cells in the local network, introducing variability in the synchronization of cell assemblies.  
380 Furthermore, recent work proposed that neuronal entrainment at  $\gamma$ -frequencies during development  
381 can impact neuronal morphology of cortical cells (Bitzenhofer et al., 2019). Thus, it is of great  
382 interest to explore the relationship between the fidelity of network activity at  $\gamma$ -frequency and  
383 neuronal morphology.

384 Surprisingly, given the established role of mitochondria in presynaptic release (Devine and Kittler,  
385 2018; Sun et al., 2013), neither spontaneous inhibitory postsynaptic transmission nor PV+  
386 interneuron mediated evoked inhibition were altered by the reduction of mitochondria in axonal  
387 boutons in Miro1<sup>( $\Delta/\Delta$ )</sup> (Supplementary Fig 2). Furthermore, these observations demonstrated that  
388 the changes in mitochondrial distribution associated with the impairments in Miro1-directed  
389 trafficking are not sufficient to alter the perisomatic inhibition applied by PV+ interneurons. The  
390 ability of PV+ interneurons to sustain inhibition and recover remained intact in the absence of  
391 Miro1 (Supplementary Fig 3). It is possible that the increased cellular concentration of  
392 mitochondria in PV+ interneurons ensures sufficient metabolic capacity to support their energetic

393 demands. Indeed, the diffusion of ATP from mitochondria rich regions to boutons devoid of  
394 mitochondria seems to be sufficient to sustain the energetic requirements of synapses (Pathak et  
395 al., 2015). Further investigation is required to understand how the changes in Miro1-dependent  
396 mitochondrial positioning and enhanced axonal branching could be implicated in varying the  
397 strength and pattern of inhibition in the hippocampus.

398 Changes in parvalbumin interneuron excitability and network activity have been associated with  
399 alterations in behavior and emergence of neurological and neuropsychiatric disorders (Inan et al.,  
400 2016; Marín, 2012; Pelkey et al., 2017; Zou et al., 2016). Thus, we performed experiments to test  
401 exploratory locomotion, memory and anxiety in control and Miro1<sup>(ΔΔ)</sup> mice and assess whether  
402 the alterations in mitochondrial dynamics and axonal morphology were physiologically relevant  
403 by having an impact on behavior. Miro1<sup>(ΔΔ)</sup> animals presented no deficits in husbandry behavior,  
404 motor coordination and learning, short-term memory and spatial exploration when compared to  
405 their littermate controls (**Supplementary Fig 4**). Interestingly, Miro1<sup>(ΔΔ)</sup> animals exhibited  
406 anxiolytic behavior, demonstrated as increased time spent in the open arms of the elevated plus  
407 maze (EPM). This observation raises the interesting question about the role of Miro1-dependent  
408 mitochondrial dynamics and PV+ interneuron signaling in distinct brain areas involved in  
409 emotional behaviors such as the ventral hippocampus, amygdala, and prefrontal cortex (Janak and  
410 Tye, 2015). In conclusion, our findings demonstrate that the Miro1-directed spatiotemporal  
411 positioning of mitochondria in PV+ interneurons can modulate axon morphology, the frequency  
412 of hippocampal network oscillations at the  $\gamma$ -band range and potentially influence stress and  
413 emotional behaviors.

414

415 **ACKNOWLEDGMENTS**

416 This work was supported by a PhD studentship from the Medical Research Council (MRC) to G.K  
417 (1405150) and grants from the MRC (MR/M024083/1) to P.C.S, the European Research Council  
418 grant 282430 (Fuelling Synapses) and the Lister Institute of Preventive Medicine to J.T.K.

419

420 **AUTHOR CONTRIBUTIONS**

421 G.K and J.T.K conceptualized the project, designed experiments and wrote the paper. G.K  
422 performed live and fixed imaging, extracellular recordings, animal behavior experiments and  
423 analyzed all data. P.A and E.O.M designed the electrophysiological experiments and kindly  
424 provided recording equipment. P.A performed all intracellular recording experiments. M.P  
425 designed animal behavior experiments that were conducted in the facility provided by P.C.S. G.K  
426 and M.P performed the animal behavior experiments. N.F.H and G.L-D assisted in training and  
427 supervision. G.L-D designed animal breeding strategy. P.A, I.L.A-C and E.O.M wrote analysis  
428 scripts. G.K, P.A, M.P, N.F.H, B.R.S, G.L-D, P.C.S, E.O.M and J.T.K edited the paper.

429

430

431

432

433

434

435 Figure 1

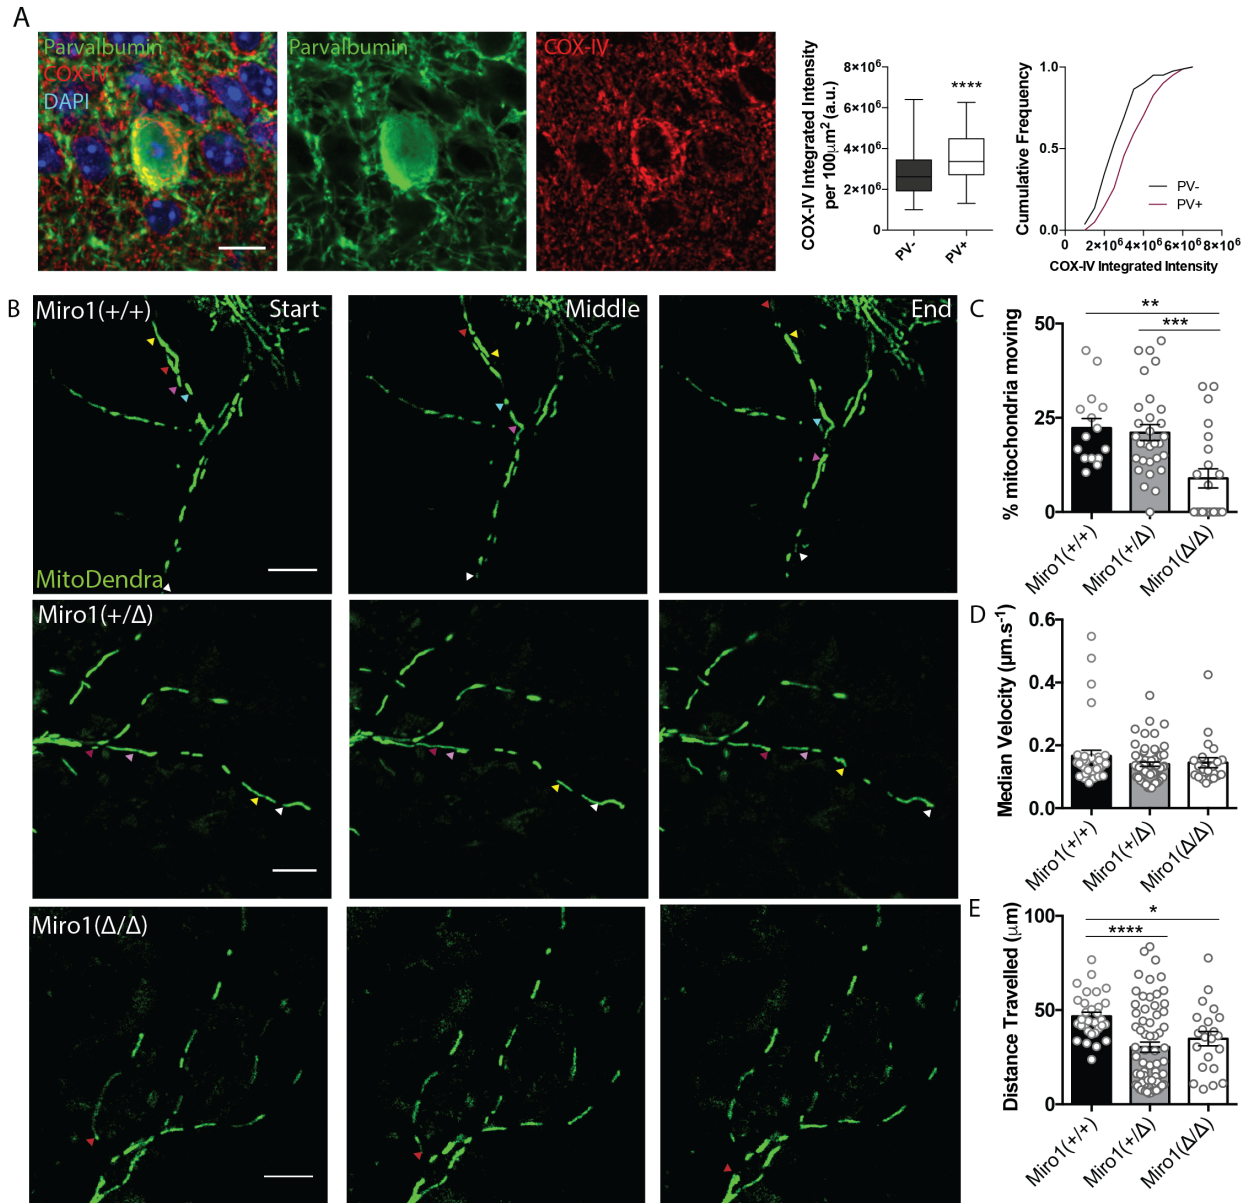

436

437 Figure 1

438 **Cell-type specific removal of Miro1 from parvalbumin interneurons impairs mitochondrial**  
439 **trafficking**

440 **A.** COX-IV levels in PV+ interneurons. The fluorescence signal of COX-IV is increased in PV  
441 immuno-positive cells in the hippocampus. Scale Bar = 10  $\mu\text{m}$ . Boxplot and cumulative  
442 distribution show the quantification of the mean integrated intensity of the COX-IV fluorescent

443 signal in PV immuno-positive and -negative regions (n = 81 cells, 11 slices, 3 animals) **B.** Miro1-  
444 directed mitochondrial trafficking in organotypic brain slices. Representative images from a 500  
445 second two-photon movie of MitoDendra+ mitochondria in PV+ interneurons in *ex vivo*  
446 organotypic hippocampal slices from Miro1<sup>(+/+)</sup>, Miro1<sup>(+/ $\Delta$ )</sup> and Miro1<sup>( $\Delta$ / $\Delta$ )</sup> animals. The colored  
447 arrows denote the position of individual mitochondria during the movie. Scale bar = 10  $\mu$ m **C.**  
448 Quantification of the percentage of moving mitochondria (n<sub>Miro(+/+)</sub> = 15 movies, 9 slices, 4  
449 animals, n<sub>Miro(+/ $\Delta$ )</sub> = 32 movies, 10 slices, 4 animals, n<sub>Miro( $\Delta$ / $\Delta$ )</sub> = 22 movies, 8 slices, 4 animals) **D.**  
450 Quantification of the median velocity (n<sub>Miro(+/+)</sub> = 35 mitochondria, n<sub>Miro(+/ $\Delta$ )</sub> = 65 mitochondria,  
451 n<sub>Miro( $\Delta$ / $\Delta$ )</sub> = 22 mitochondria) **E.** Quantification of the distance travelled (n<sub>Miro(+/+)</sub> = 35  
452 mitochondria, n<sub>Miro(+/ $\Delta$ )</sub> = 65 mitochondria, n<sub>Miro( $\Delta$ / $\Delta$ )</sub> = 22 mitochondria) .

453

454

455

456

457

458

459

460

461

462

463

464

465

466 Figure 2

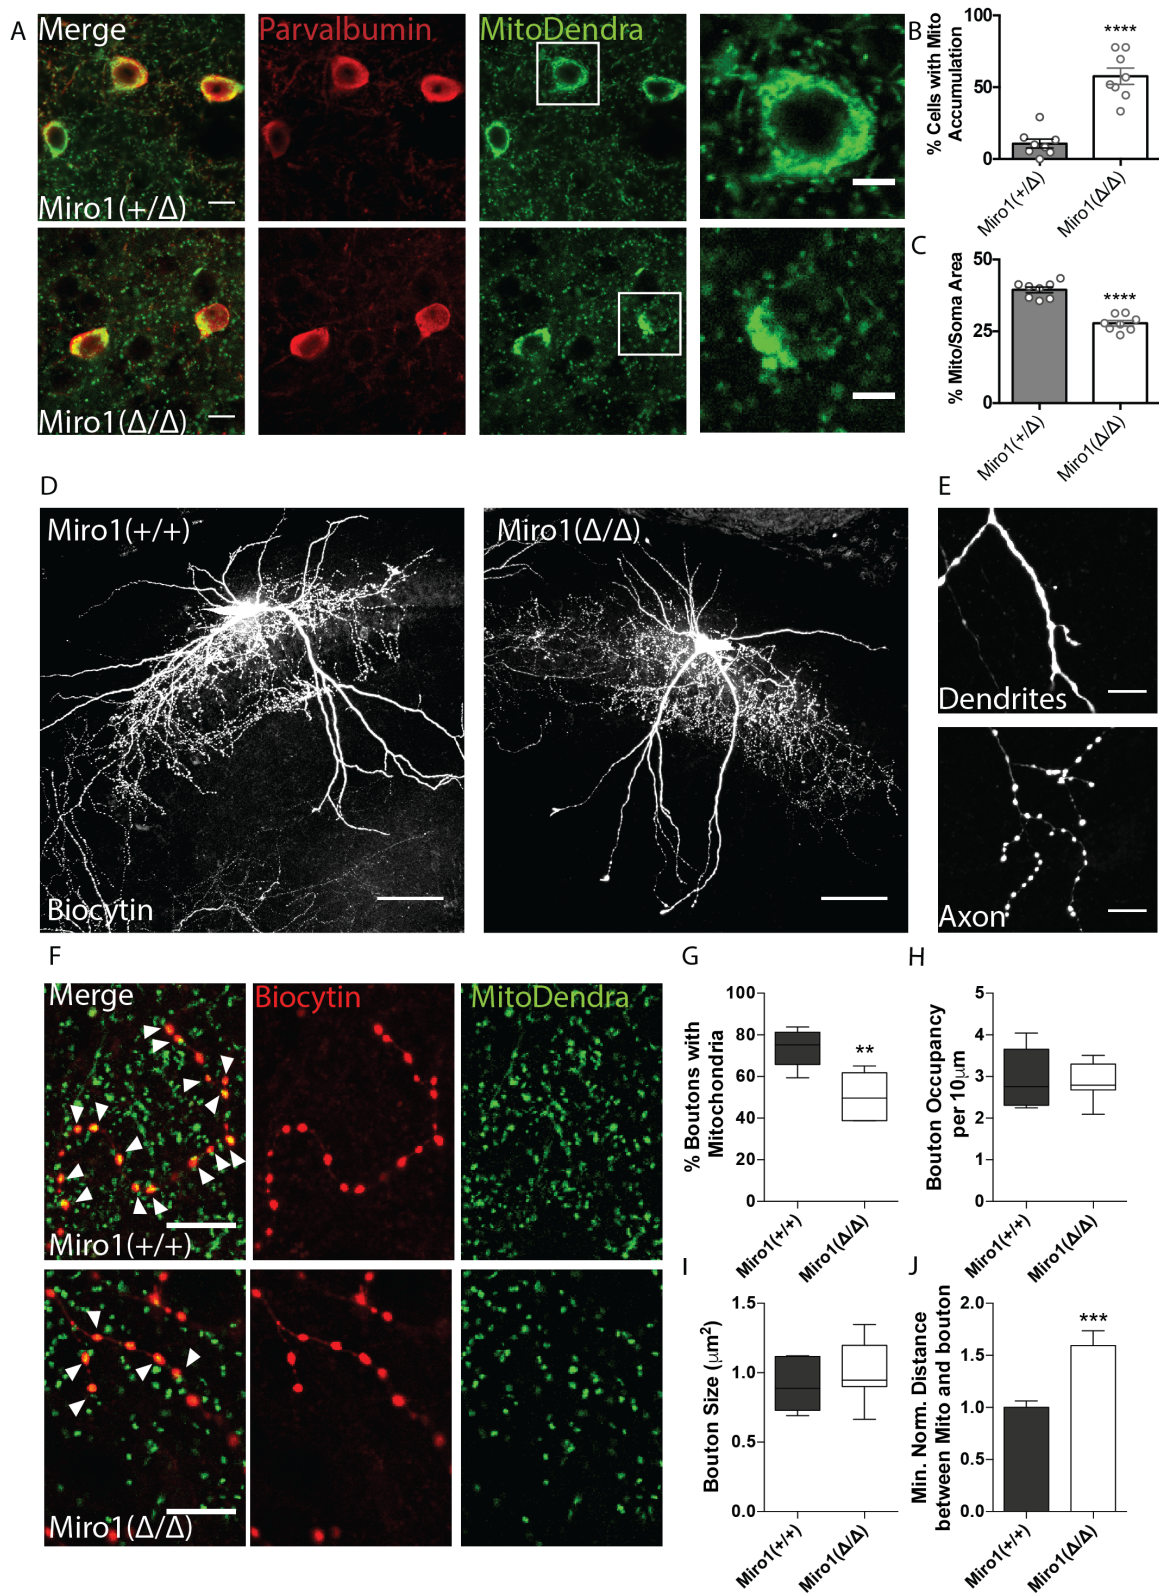

467

468 Figure 2

469 **Loss of Miro1 results in an accumulation of mitochondria in the soma and depletion from**  
470 **axonal presynaptic terminals**

471 **A.** Loss of Miro1 results in MitoDendra+ accumulation in the somata of PV+ interneurons.

472 Confocal images from Miro1<sup>(+/Δ)</sup> and Miro1<sup>(Δ/Δ)</sup> PV immuno-positive cells in fixed brain tissue.

473 Scale bar = 10 μm. Cells in the white box are zoomed as illustrated in the images on the right, to

474 clearly depict the mitochondrial accumulations in the Miro1<sup>(Δ/Δ)</sup>. Scale bar = 5 μm. **B.** Bar chart

475 shows the quantification for the percentage of cells that contain mitochondrial clusters ( $n_{\text{Miro}(+/Δ)} =$

476 8 slices, 3 animals and  $n_{\text{Miro}(Δ/Δ)} = 8$  slices, 3 animals) **C.** Quantification for the percentage area

477 that mitochondria occupy within the PV immuno-positive soma. Due to the presence of

478 mitochondrial accumulations the %Mito/Soma area is significantly decreased in the Miro1<sup>(Δ/Δ)</sup>

479 ( $n_{\text{Miro}(+/Δ)} = 8$  slices, 3 animals and  $n_{\text{Miro}(Δ/Δ)} = 8$  slices, 3 animals). **D.** Representative max-projected

480 confocal stack of biocytin-filled PV+ interneurons in the hippocampus of 350 μm fixed acute brain

481 slices. Scale bar = 100 μm **E.** Example of the distinct distribution of biocytin in dendritic and

482 axonal compartments. Biocytin is diffused in dendrites (top) and clustered in axonal terminals

483 (bottom) **F.** Loss of Miro1 depletes mitochondria from axonal presynaptic terminals.

484 Representative images of biocytin-filled synaptic boutons (red) and mitochondria (green) in

485 Miro1<sup>(+/+)</sup> and Miro1<sup>(Δ/Δ)</sup> neurons. Arrows point to boutons that contain mitochondria. Scale bar =

486 5 μm **G.** Boxplots for the quantification of the percentage of boutons that contain mitochondria

487 ( $n_{\text{Miro}(+/+)} = 5$  neurons, 4 slices, 2 animals and  $n_{\text{Miro}(Δ/Δ)} = 7$  neurons, 6 slices, 3 animals) **H.** Boxplots

488 for the quantification of the occupancy of boutons in axonal segments ( $n_{\text{Miro}(+/+)} = 5$  neurons, 4

489 slices, 2 animals and  $n_{\text{Miro}(Δ/Δ)} = 7$  neurons, 6 slices, 3 animals) **I.** Quantification of the mean size

490 of boutons ( $n_{\text{Miro}(+/+)} = 625$  boutons, 5 neurons, 4 slices, 2 animals,  $n_{\text{Miro}(Δ/Δ)} = 526$  boutons, 7

491 neurons, 6 slices, 3 animals) **J.** Quantification for the minimum normalised distance between  
492 boutons and mitochondria ( $n_{\text{Miro}(+/+)} = 625$  boutons, 5 neurons, 4 slices, 2 animals,  $n_{\text{Miro}(\Delta/\Delta)} = 526$   
493 boutons, 7 neurons, 6 slices, 3 animals).

494

495

496

497

498

499

500

501

502

503

504

505

506

507

508

509

510

511

512

513



514 Figure 3

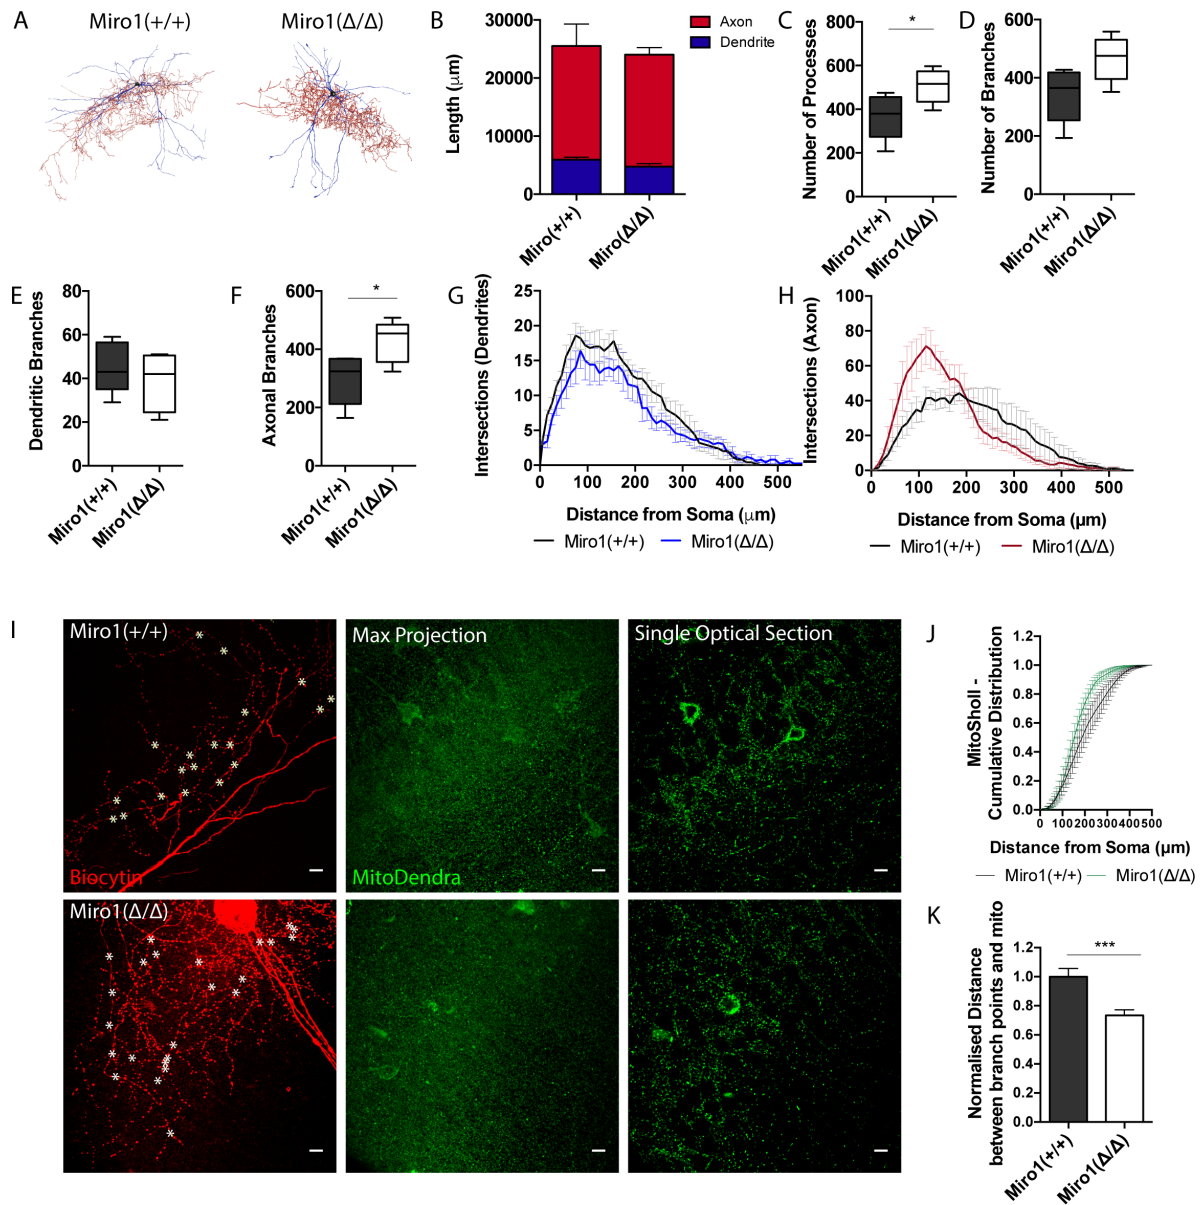

515

516 Figure 3

517 **Loss of Miro1 results in increased axonal branching in hippocampal parvalbumin**  
 518 **interneurons**

519 **A.** Max-projected reconstruction of the neurons in Fig 2D from Neuromantic software. Dendrites

520 are depicted in blue and axons in red. **B.** Quantification of the neuronal length with the dendritic

521 and axonal contribution depicted in blue and red respectively. **C.** Boxplot for the quantification of  
522 the total number of processes **D.** Boxplot for the quantification of the total number of branches **E.**  
523 Box plot for the quantification of the number of dendritic branches. **F.** Box plot for the  
524 quantification of the number of axonal branches. **G.** Number of intersections between dendritic  
525 branches and Sholl rings are plotted at distances away from the soma **H.** Number of intersections  
526 between axonal branches and Sholl rings are plotted at distances away from the soma. ( $n_{\text{Miro}(+/+)} =$   
527 5 neurons, 3 slices, 2 animals,  $n_{\text{Miro}(\Delta/\Delta)} = 5$  neurons, 4 slices, 3 animals). **I.** Loss of Miro1 results  
528 in mitochondria being found closer to points of axonal branching. High magnification (63x) max-  
529 projected confocal stacks of biocytin in a 350  $\mu\text{m}$  hippocampal slice. Analysis was performed in  
530 3D in single optical sections. White stars denote branch points. Scale bar = 10  $\mu\text{m}$ . **J.** Cumulative  
531 distribution of the MitoDendra+ mitochondrial network (MitoSholl) in individual PV+ interneuron  
532 ( $n_{\text{Miro}(+/+)} = 5$  neurons, 3 slices, 2 animals,  $n_{\text{Miro}(\Delta/\Delta)} = 4$  neurons, 4 slices, 3 animals). **K.** Bar graph  
533 shows the normalised minimum distance between a branch point and a mitochondrion in the  
534 confocal stack ( $n_{\text{Miro}(+/+)} = 122$  branch points, 5 neurons, 4 slices, 2 animals and  $n_{\text{Miro}(\Delta/\Delta)} = 171$   
535 branch points, 7 neurons, 6 slices, 3 animals).

536

537

538

539

540

541

542

543

544 Figure 4

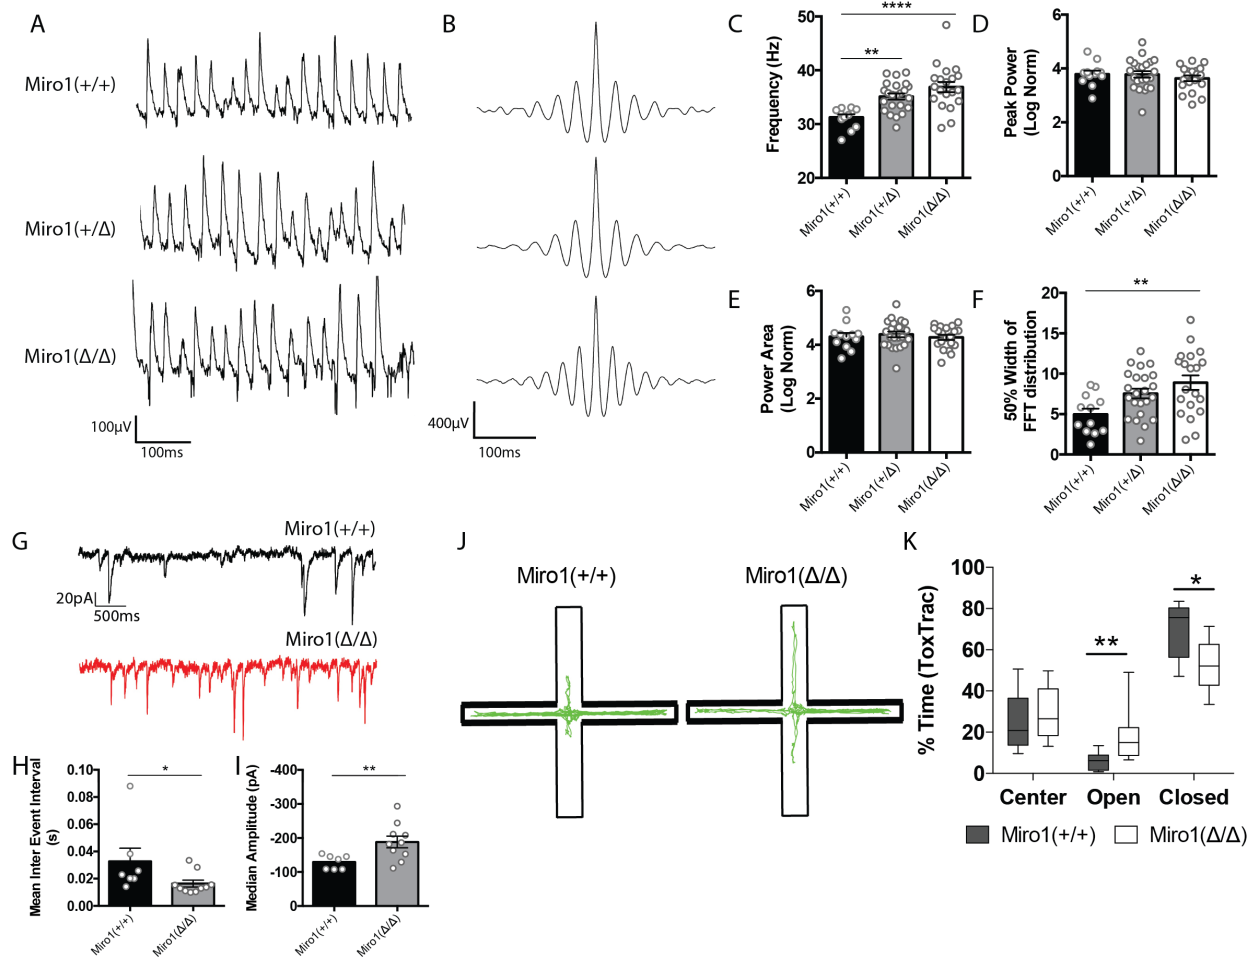

545

546 Figure 4

547 **Miro1 knock-out results in altered hippocampal network activity and anxiety-related**  
 548 **behavior**

549 **A.** Loss of Miro1 increases the frequency of  $\gamma$ -oscillations. Representative local field potential  
 550 recordings from the stratum pyramidale of the CA3 hippocampal area in acute brain slices from  
 551 Miro1(+/+), Miro1(+/ $\Delta$ ) and Miro1( $\Delta/\Delta$ ) slices **B.** Representative auto-correlogram of  $\gamma$ -oscillations  
 552 from Miro1(+/+), Miro1(+/ $\Delta$ ) and Miro1( $\Delta/\Delta$ ) animals **C.** Quantification of the peak frequency **D.**  
 553 Quantification of the normalised peak power. **E.** Quantification of the normalised power area **F.**  
 554 Quantification of the 50% width dispersion of the FFT distribution ( $n_{\text{Miro}(+/+)} = 12$  slices, 2 animals,

555  $n_{\text{Miro}^{(+/\Delta)}} = 23$  slices, 6 animals and  $n_{\text{Miro}^{(\Delta/\Delta)}} = 20$  slices, 6 animals). **G.**  $\text{Miro1}^{(\Delta/\Delta)}$  PV+ interneurons  
556 received increased glutamateric input. Representative electrophysiological traces from  $\text{Miro1}^{(+/+)}$   
557 (black) and  $\text{Miro1}^{(\Delta/\Delta)}$  (red) cells. **H.** Quantification for the mean inter-event interval (IEI). **I.**  
558 Quantification for the median amplitude ( $n_{\text{Miro}^{(+/+)}} = 7$  recordings, 2 animals and  $n_{\text{Miro}^{(\Delta/\Delta)}} = 10$   
559 recordings, 2 animals). **J.** Assessment of anxiety-related behavior using the elevated plus maze  
560 (EPM). Schematic diagram of the EPM and representative ToxTrac trajectories (green) from  
561  $\text{Miro1}^{(+/+)}$  and  $\text{Miro1}^{(\Delta/\Delta)}$  animals. **K.** Boxplot for the quantification of the percentage of time that  
562  $\text{Miro1}^{(+/+)}$  and  $\text{Miro1}^{(\Delta/\Delta)}$  animals spent in the closed, open arms and center of the EPM ( $n_{\text{Miro}^{(+/+)}}$   
563 = 9 animals,  $n_{\text{Miro}^{(\Delta/\Delta)}} = 8$  animals)

564

565

566

567

568

569

570

571

572

573

574

575

576

577

578 Supplementary Figure 1

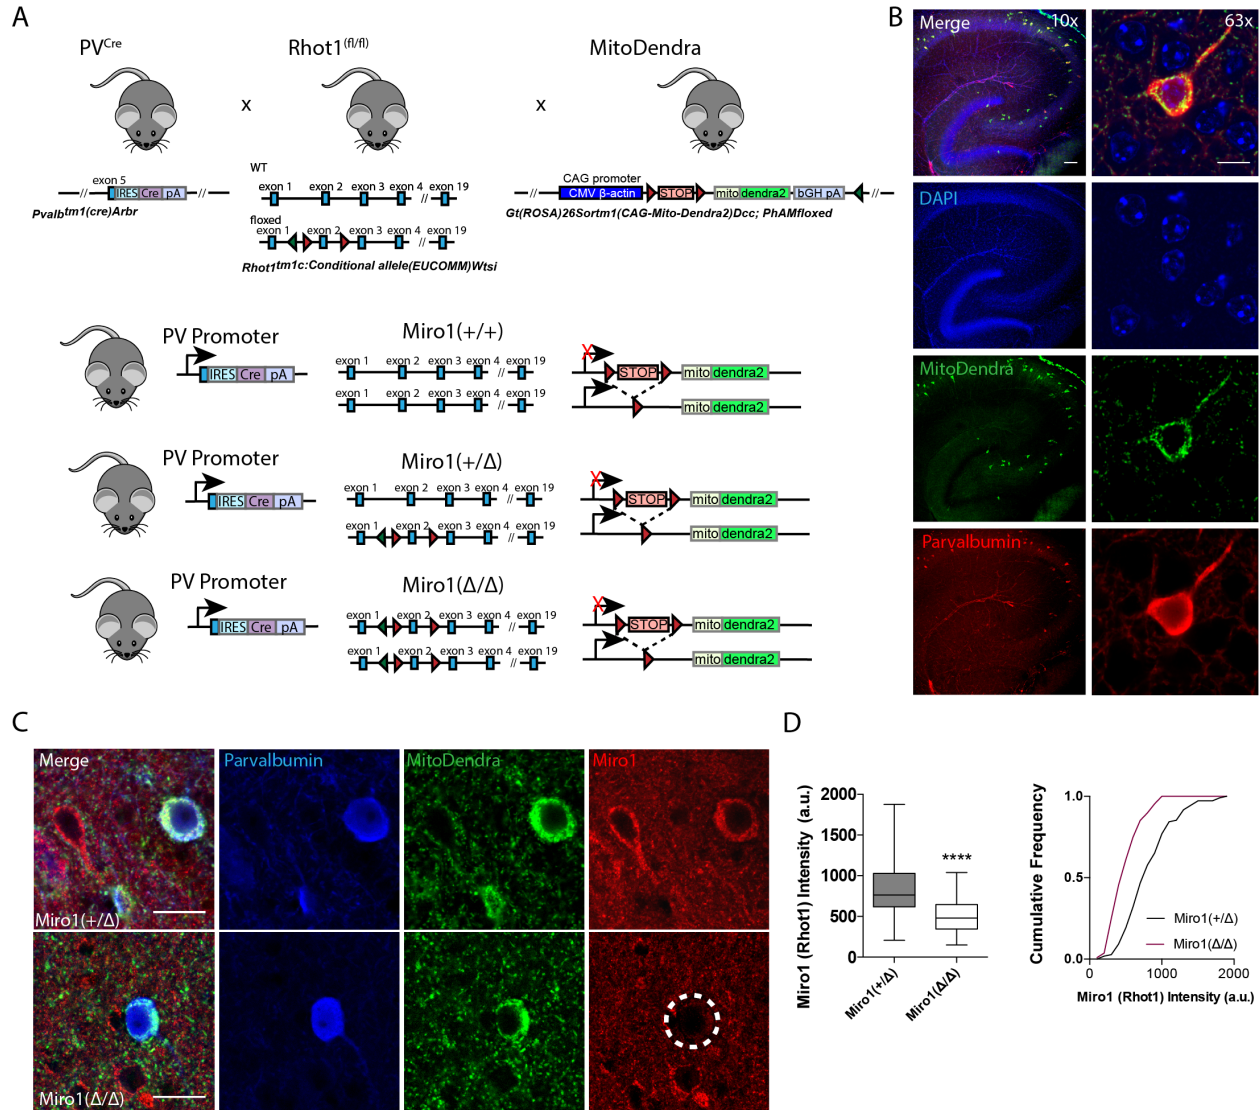

579

580 Supplementary Figure 1

581 **Generation of the PV<sup>Cre</sup> Rhot1<sup>(fl/fl)</sup> MitoDendra transgenic mouse line and conditional**  
 582 **removal of Miro1 from MitoDendra-expressing parvalbumin interneurons.**

583 **A.** Schematic diagram of the genetic recombination for the expression of MitoDendra and  
 584 simultaneous conditional removal of Miro1. When the Cre recombinase is expressed, under the  
 585 PV+ promoter, the stop-flxed codon in the Rosa26 locus is excised allowing for the downstream  
 586 expression of MitoDendra. Additionally, the second exon of the Rhot1 gene is found between two

587 loxP sites and therefore removed selectively in PV+ interneurons **B.** Cell-type specific expression  
588 of MitoDendra in PV+ interneurons. Left: Representative low magnification (10x) confocal image  
589 demonstrating the PV+ interneuron distribution in the acute brain slices of the hippocampus in the  
590 PV<sup>Cre</sup> MitoDendra mouse. Scale Bar = 100  $\mu$ m. Right: Representative high magnification (63x)  
591 image of a MitoDendra-expressing cell that is also PV immuno-positive. Scale Bar = 10  $\mu$ m **C.**  
592 Loss of Miro1 from PV+ expressing interneurons. Representative confocal image from hemi-  
593 floxed control (Miro1<sup>(+/Δ)</sup>) and conditional knock-out (Miro1<sup>(Δ/Δ)</sup>) animals. Scale Bar = 10  $\mu$ m. The  
594 fluorescent signal for Miro1 is specifically reduced in PV immuno-positive cells (white dotted  
595 circle shows the PV immuno-positive cell with low Miro1 fluorescence). **D.** Boxplot and  
596 cumulative frequency distribution of the *Rhot1* (Miro1) fluorescent intensity signal ( $n_{\text{Miro}(+/Δ)} = 109$   
597 neurons, 4 slices, 2 animals and  $n_{\text{Miro}(Δ/Δ)} = 109$  neurons, 4 slices, 2 animals).

598

599

600

601

602

603

604

605

606

607

608

609

610 Supplementary Figure 2

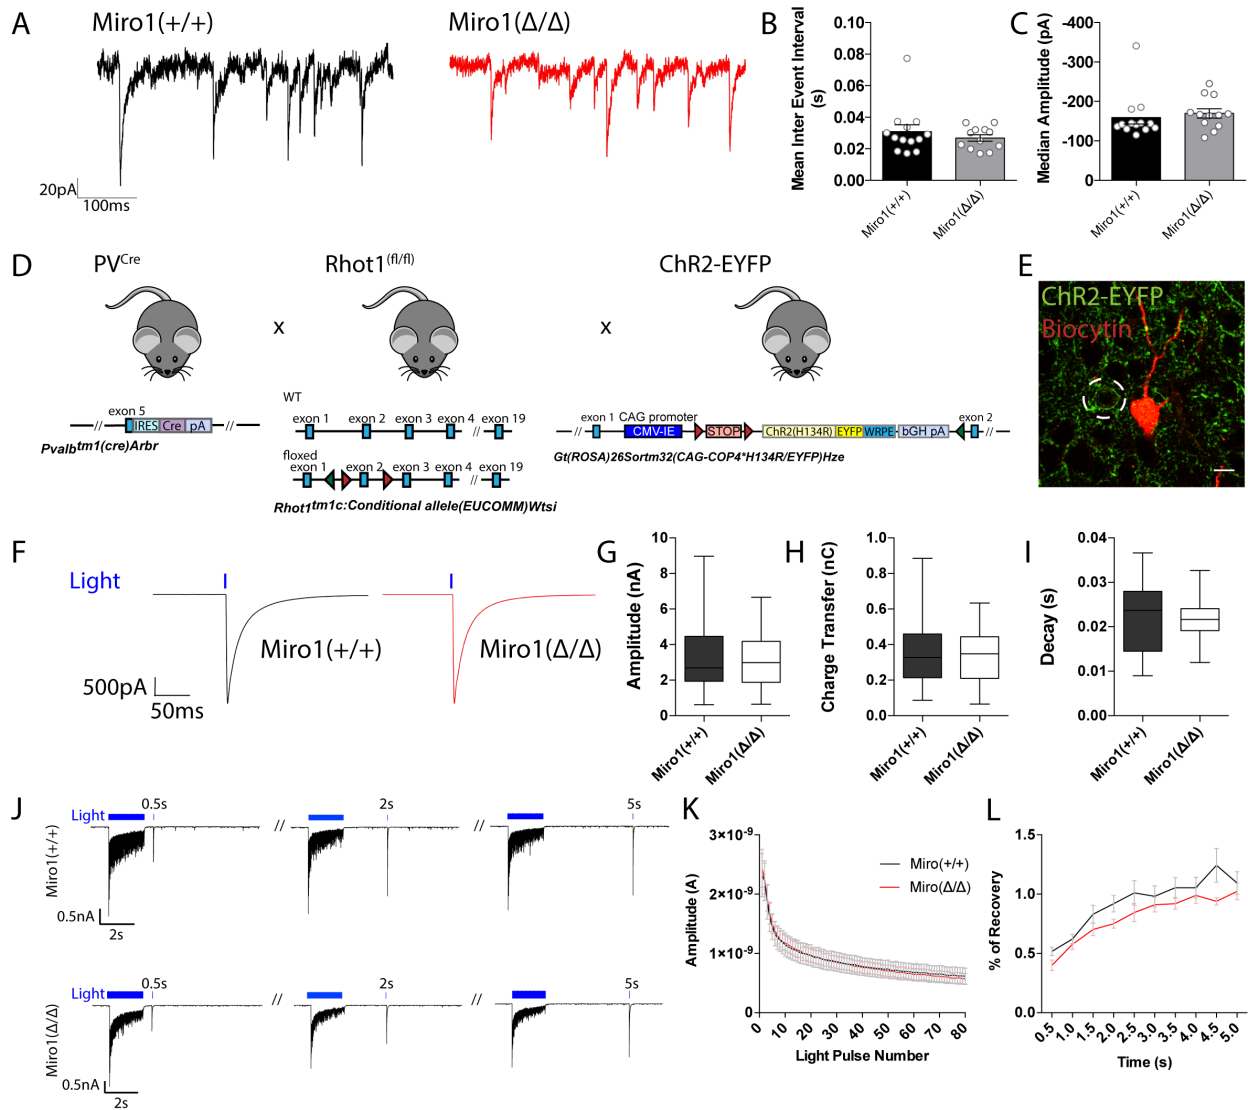

611

612 Supplementary Figure 2

613 **Miro1 knock-out does not alter spontaneous and evoked inhibitory synaptic transmission in**  
 614 **the hippocampus.**

615 **A.** Representative electrophysiological traces of spontaneous inhibitory post-synaptic currents  
 616 from Miro1<sup>(+/+)</sup> (black) and Miro1<sup>( $\Delta/\Delta$ )</sup> (red) cells in the hippocampus. **B.** Quantification for the  
 617 mean inter-event interval (IEI) **C.** Quantification for the median sIPSC amplitude. ( $n_{\text{Miro}(+/+)} = 13$   
 618 recordings, 2 animals and  $n_{\text{Miro}(\Delta/\Delta)} = 12$  recordings, 2 animals) **D.** Generation of the PV<sup>Cre</sup> *Rhot1*

619 ChR2-EYFP transgenic mouse line. Schematic diagram of the expression of ChR2-EYFP and  
620 simultaneous conditional removal of *Rhot1*. When the Cre recombinase is expressed, under the  
621 PV+ promoter, the stop-floxed codon is excised from the *Rosa26* locus allowing the downstream  
622 expression of ChR2-EYFP. Additionally, the second exon of the *Rhot1* gene is found between two  
623 loxP sites and also removed selectively in PV+ interneurons. **E.** Example of confocal image from  
624 a biocytin-filled recorded pyramidal cell in the hippocampus (red) in close proximity to a YFP+  
625 PV+ interneuron (green). Scale bar = 10  $\mu$ m. **F.** Representative traces from light evoked inhibitory  
626 postsynaptic current (eIPSC) in *Miro1*<sup>(+/+)</sup> (black) and *Miro1*<sup>( $\Delta/\Delta$ )</sup> (red) cells in acute brain slices  
627 ( $n_{\text{Miro}(+/+)} = 23$  recordings, 4 animals and  $n_{\text{Miro}(\Delta/\Delta)} = 23$  recordings, 4 animals). **G.** Boxplot for the  
628 quantification of peak amplitude. **H.** Boxplot for the quantification of charge transfer. **I.** Boxplot  
629 for the quantification of decay. **J.** Control and conditional knock-out cells can sustain inhibition  
630 and recover with similar rates after long-lasting photostimulation. Example traces from the  
631 inhibitory responses pyramidal cells received in *Miro1*<sup>(+/+)</sup> and *Miro1*<sup>( $\Delta/\Delta$ )</sup> slices during light train  
632 stimulation (40 Hz for 2s; 1 ms pulse width) **K.** Mean amplitude of each peak during the light train  
633 stimulation ( $n_{\text{Miro}(+/+)} = 21$  recordings, 4 animals and  $n_{\text{Miro}(\Delta/\Delta)} = 24$  recordings, 4 animals). **L.**  
634 Quantification of the percentage recovery after light stimulation of all cells at increasing time  
635 intervals from the end of the light train ( $n_{\text{Miro}(+/+)} = 21$  recordings, 4 animals and  $n_{\text{Miro}(\Delta/\Delta)} = 18$   
636 recordings, 3 animals).

637

638

639

640

641



642 Supplementary Figure 3

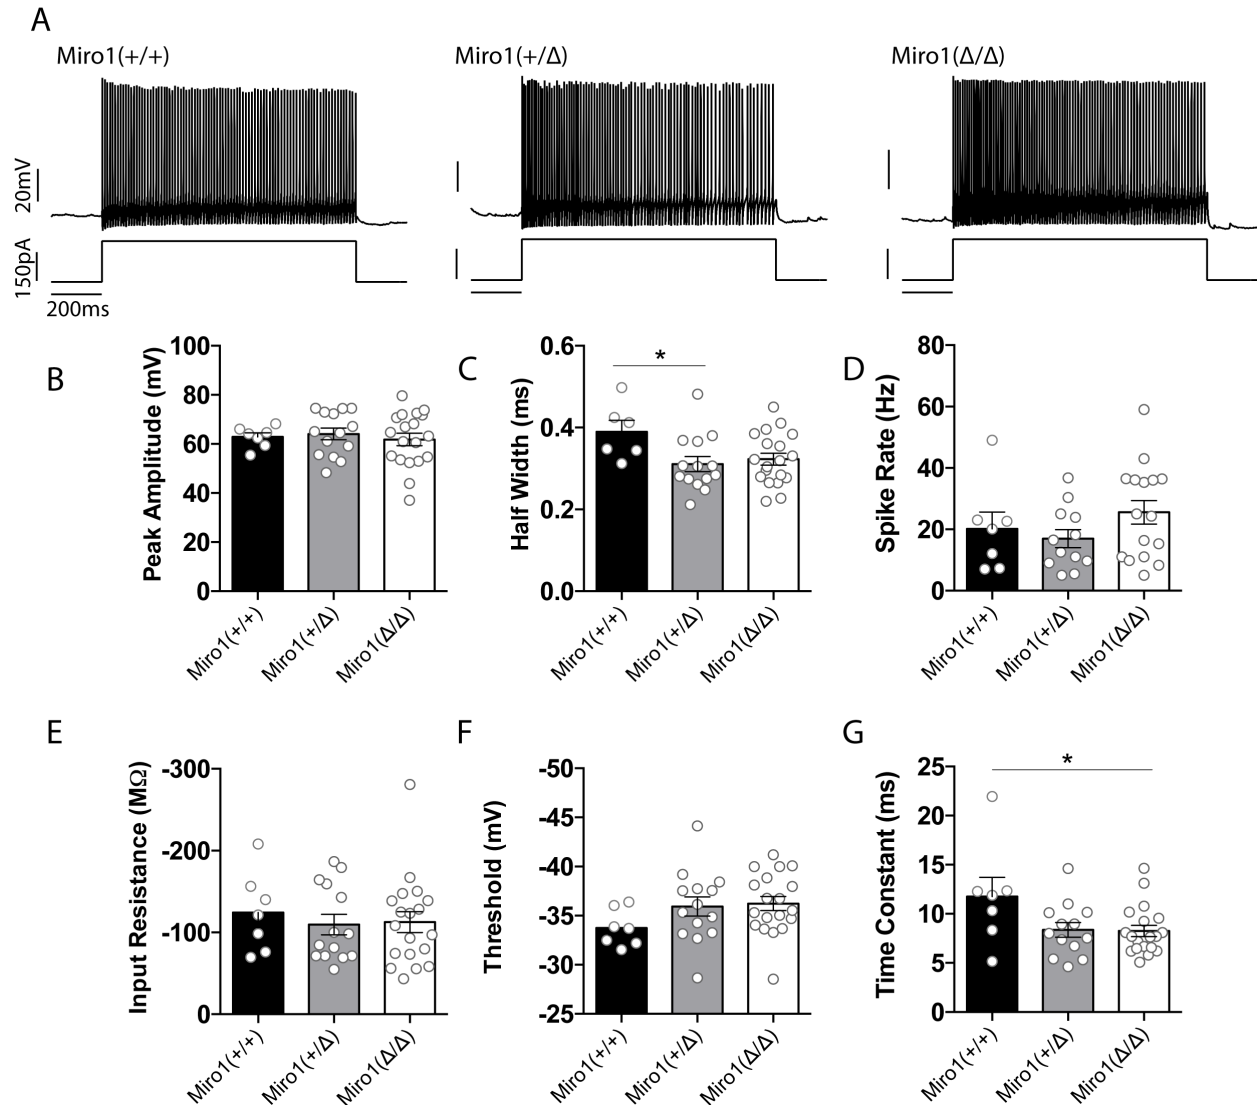

643

644 Supplementary Figure 3

645 **Intrinsic properties of PV+ interneurons in the absence of Miro1**

646 **A.** Representative traces of the firing patterns of Miro1<sup>(+/+)</sup>, Miro1<sup>(+/\Delta)</sup> and Miro1<sup>(\Delta/\Delta)</sup> cells in  
647 response to 200 pA current injection ( $n_{\text{Miro1}(+/+)} = 2$  animals,  $n_{\text{Miro1}(+/\Delta)} = 4$  animals,  $n_{\text{Miro1}(\Delta/\Delta)} = 5$   
648 animals). **B.** Quantification of the action potential peak amplitude **C.** Quantification of the action  
649 potential half-width. **D.** Quantification of Spike Rate at RheoBase +40 pA. Cells that fire less than

650 5 spikes were excluded from the quantification. **E.** Quantification of input resistance **F.**

651 Quantification of threshold to fire **G.** Quantification of time constant.

652

653

654

655

656

657

658

659

660

661

662

663

664

665

666

667

668

669

670

671

672

673 Supplementary Figure 4

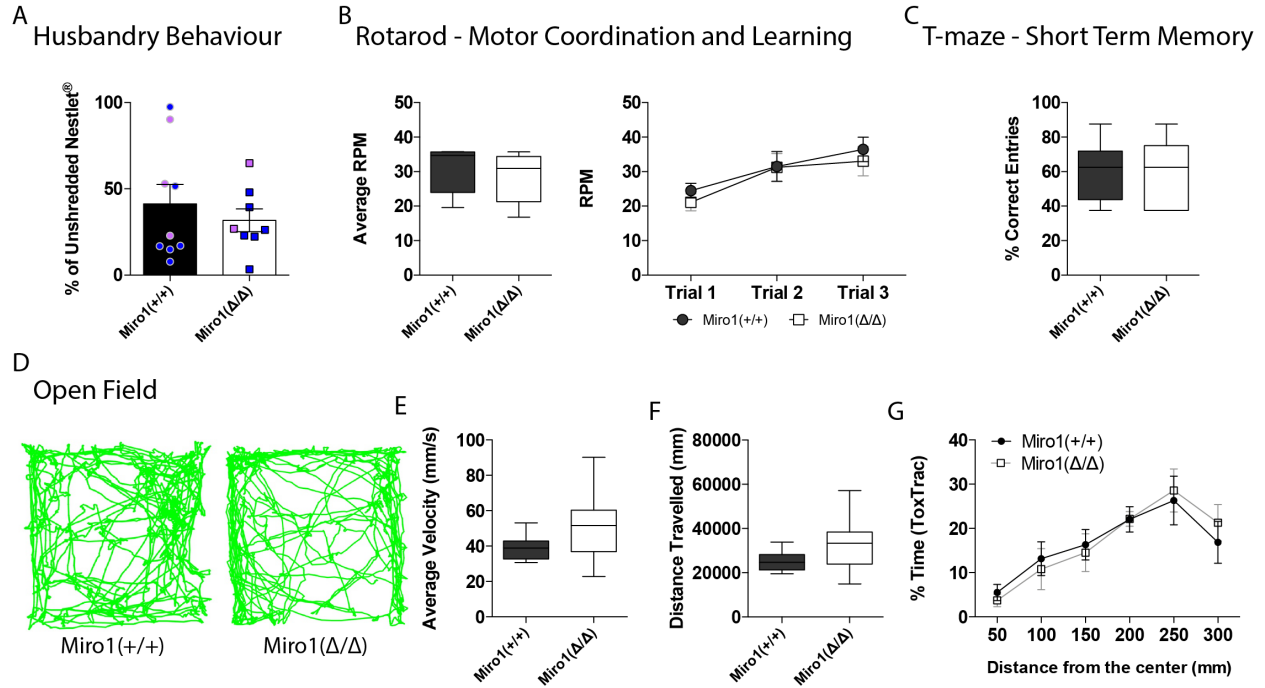

674

675 Supplementary Figure 4

676 **Loss of Miro1 does not affect husbandry behavior, motor coordination, short term memory**  
677 **and spatial exploration.**

678 **A.** Assessment of husbandry behavior based on the amount of shredded and unshredded Nestlet  
679 between Miro1<sup>(+/+)</sup> and Miro1<sup>(Δ/Δ)</sup> animals. Bar chart shows the quantification of the percentage of  
680 unshredded Nestlet. Blue points represent values from male mice and pink points represent values  
681 from female mice ( $n_{\text{Miro1}(+/+)} = 9$  animals,  $n_{\text{Miro1}(\Delta/\Delta)} = 8$  animals). **B.** Assessment of motor  
682 coordination using the rotarod. The animal is placed on the revolving rot until it falls and the speed  
683 at which it falls is registered to calculate the revolutions per minute (RPM) indicated by the box  
684 plot ( $n_{\text{Miro1}(+/+)} = 5$  animals,  $n_{\text{Miro1}(\Delta/\Delta)} = 5$  animals). **C.** Assessment of short-term memory using the  
685 spontaneous alternation T-maze behavioral paradigm. The animal starts every trial at position  
686 marked as start, the animal is allowed to make a decision at the end of the maze and is kept in that

687 arm for 30 seconds. A correct entry is considered when the animal makes the opposite decision  
688 from the previous trial. A wrong entry is when the animals makes the same decision as in the  
689 previous trial. Box plot shows the quantification of the percentage of correct entries. ( $n_{\text{Miro}(+/+)} = 8$   
690 animals,  $n_{\text{Miro}(\Delta/\Delta)} = 7$  animals). **D.** Assessment of general exploration in an open field. Example  
691 trajectories (green) of  $\text{Miro1}^{(+/+)}$  and  $\text{Miro1}^{(\Delta/\Delta)}$  animals. **E.** Box plot for the quantification of the  
692 average velocity. **F.** Box plot for the quantification of the distance travelled. **G.** Quantification of  
693 the percentage time spent at distances away from the centre of the box ( $n_{\text{Miro}(+/+)} = 9$  animals,  
694  $n_{\text{Miro}(\Delta/\Delta)} = 9$  animals).

695

696

697

698

699

700

701

702

703

704

705

706 **REFERENCES**

- 707 Adams, D.L., Economides, J.R., and Horton, J.C. (2015). Co-localization of glutamic acid  
708 decarboxylase and vesicular GABA transporter in cytochrome oxidase patches of macaque striate  
709 cortex. *Vis Neurosci* 32, E026.
- 710 Akam, T., and Kullmann, D.M. (2010). Oscillations and filtering networks support flexible routing  
711 of information. *Neuron* 67, 308–320.
- 712 Antonoudiou, P., Tan, Y.L., Kontou, G., Upton, A.L., and Mann, E.O. (2020). Parvalbumin and  
713 somatostatin interneurons contribute to the generation of hippocampal gamma oscillations. *The*  
714 *Journal of Neuroscience*. doi: 10.1523/JNEUROSCI.0261-20.2020.
- 715 Attwell, D., and Laughlin, S.B. (2001). An energy budget for signaling in the grey matter of the  
716 brain. *J. Cereb. Blood Flow Metab.* 21, 1133–1145.
- 717 Barnes, S.A., Pinto-Duarte, A., Kappe, A., Zembrzycki, A., Metzler, A., Mukamel, E.A., Lucero,  
718 J., Wang, X., Sejnowski, T.J., Markou, A., et al. (2015). Disruption of mGluR5 in parvalbumin-  
719 positive interneurons induces core features of neurodevelopmental disorders. *Mol. Psychiatry* 20,  
720 1161–1172.
- 721 Bartos, M., Vida, I., and Jonas, P. (2007). Synaptic mechanisms of synchronized gamma  
722 oscillations in inhibitory interneuron networks. *Nat. Rev. Neurosci.* 8, 45–56.
- 723 Birsa, N., Norkett, R., Higgs, N., Lopez-Domenech, G., and Kittler, J.T. (2013). Mitochondrial  
724 trafficking in neurons and the role of the Miro family of GTPase proteins. *Biochem. Soc. Trans.*  
725 41, 1525–1531.
- 726 Bitzenhofer, S.H., Poeppelau, J.A., Chini, M., Marquardt, A., and Hanganu-Opatz, I. (2019).  
727 Activity-dependent maturation of prefrontal gamma oscillations sculpts cognitive performance.  
728 *BioRxiv*.

- 729 Buzsáki, G., and Wang, X.-J. (2012). Mechanisms of gamma oscillations. *Annu. Rev. Neurosci.*  
730 *35*, 203–225.
- 731 Cardin, J.A., Carlén, M., Meletis, K., Knoblich, U., Zhang, F., Deisseroth, K., Tsai, L.-H., and  
732 Moore, C.I. (2009). Driving fast-spiking cells induces gamma rhythm and controls sensory  
733 responses. *Nature* *459*, 663–667.
- 734 Chada, S.R., and Hollenbeck, P.J. (2003). Mitochondrial movement and positioning in axons: the  
735 role of growth factor signaling. *J. Exp. Biol.* *206*, 1985–1992.
- 736 Chada, S.R., and Hollenbeck, P.J. (2004). Nerve growth factor signaling regulates motility and  
737 docking of axonal mitochondria. *Curr. Biol.* *14*, 1272–1276.
- 738 Chattopadhyaya, B., Di Cristo, G., Higashiyama, H., Knott, G.W., Kuhlman, S.J., Welker, E., and  
739 Huang, Z.J. (2004). Experience and activity-dependent maturation of perisomatic GABAergic  
740 innervation in primary visual cortex during a postnatal critical period. *J. Neurosci.* *24*, 9598–9611.
- 741 Chattopadhyaya, B., Di Cristo, G., Wu, C.Z., Knott, G., Kuhlman, S., Fu, Y., Palmiter, R.D., and  
742 Huang, Z.J. (2007). GAD67-mediated GABA synthesis and signaling regulate inhibitory synaptic  
743 innervation in the visual cortex. *Neuron* *54*, 889–903.
- 744 Courchet, J., Lewis, T.L., Lee, S., Courchet, V., Liou, D.-Y., Aizawa, S., and Polleux, F. (2013).  
745 Terminal axon branching is regulated by the LKB1-NUAK1 kinase pathway via presynaptic  
746 mitochondrial capture. *Cell* *153*, 1510–1525.
- 747 De Simoni, A., and Yu, L.M.Y. (2006). Preparation of organotypic hippocampal slice cultures:  
748 interface method. *Nat. Protoc.* *1*, 1439–1445.
- 749 Deacon, R.M.J. (2006). Assessing nest building in mice. *Nat. Protoc.* *1*, 1117–1119.
- 750 Deacon, R.M.J. (2013). Measuring motor coordination in mice. *J. Vis. Exp.* e2609.
- 751 Deacon, R.M.J., and Rawlins, J.N.P. (2006). T-maze alternation in the rodent. *Nat. Protoc.* *1*, 7–

752 12.

753 Devine, M.J., and Kittler, J.T. (2018). Mitochondria at the neuronal presynapse in health and  
754 disease. *Nat. Rev. Neurosci.* 19, 63–80.

755 Freund, T.F., and Buzsáki, G. (1996). Interneurons of the hippocampus. *Hippocampus*.

756 Fries, P. (2015). Rhythms for Cognition: Communication through Coherence. *Neuron* 88, 220–  
757 235.

758 Galow, L.V., Schneider, J., Lewen, A., Ta, T.-T., Papageorgiou, I.E., and Kann, O. (2014). Energy  
759 substrates that fuel fast neuronal network oscillations. *Front. Neurosci.* 8, 398.

760 Glausier, J.R., Roberts, R.C., and Lewis, D.A. (2017). Ultrastructural analysis of parvalbumin  
761 synapses in human dorsolateral prefrontal cortex. *J. Comp. Neurol.* 525, 2075–2089.

762 Gulyás, A.I., Buzsáki, G., Freund, T.F., and Hirase, H. (2006). Populations of hippocampal  
763 inhibitory neurons express different levels of cytochrome c. *Eur. J. Neurosci.* 23, 2581–2594.

764 Guo, X., Macleod, G.T., Wellington, A., Hu, F., Panchumarthi, S., Schoenfield, M., Marin, L.,  
765 Charlton, M.P., Atwood, H.L., and Zinsmaier, K.E. (2005). The GTPase dMiro is required for  
766 axonal transport of mitochondria to *Drosophila* synapses. *Neuron* 47, 379–393.

767 Hájos, N., Pálhalmi, J., Mann, E.O., Németh, B., Paulsen, O., and Freund, T.F. (2004). Spike  
768 timing of distinct types of GABAergic interneuron during hippocampal gamma oscillations in  
769 vitro. *J. Neurosci.* 24, 9127–9137.

770 Hippenmeyer, S., Vrieseling, E., Sigrist, M., Portmann, T., Laengle, C., Ladle, D.R., and Arber,  
771 S. (2005). A developmental switch in the response of DRG neurons to ETS transcription factor  
772 signaling. *PLoS Biol.* 3, e159.

773 Hirokawa, N., Niwa, S., and Tanaka, Y. (2010). Molecular motors in neurons: transport  
774 mechanisms and roles in brain function, development, and disease. *Neuron* 68, 610–638.

775 Howard, M.W., Rizzuto, D.S., Caplan, J.B., Madsen, J.R., Lisman, J., Aschenbrenner-Scheibe, R.,  
776 Schulze-Bonhage, A., and Kahana, M.J. (2003). Gamma oscillations correlate with working  
777 memory load in humans. *Cereb. Cortex* *13*, 1369–1374.

778 Hu, H., Gan, J., and Jonas, P. (2014). Interneurons. Fast-spiking, parvalbumin<sup>+</sup> GABAergic  
779 interneurons: from cellular design to microcircuit function. *Science* *345*, 1255263.

780 Huang, Z.J., Di Cristo, G., and Ango, F. (2007). Development of GABA innervation in the cerebral  
781 and cerebellar cortices. *Nat. Rev. Neurosci.* *8*, 673–686.

782 Huchzermeyer, C., Albus, K., Gabriel, H.-J., Otáhal, J., Taubenberger, N., Heinemann, U.,  
783 Kovács, R., and Kann, O. (2008). Gamma oscillations and spontaneous network activity in the  
784 hippocampus are highly sensitive to decreases in pO<sub>2</sub> and concomitant changes in mitochondrial  
785 redox state. *J. Neurosci.* *28*, 1153–1162.

786 Huchzermeyer, C., Berndt, N., Holzhütter, H.-G., and Kann, O. (2013). Oxygen consumption rates  
787 during three different neuronal activity states in the hippocampal CA3 network. *J. Cereb. Blood*  
788 *Flow Metab.* *33*, 263–271.

789 Inan, M., Zhao, M., Manuszak, M., Karakaya, C., Rajadhyaksha, A.M., Pickel, V.M., Schwartz,  
790 T.H., Goldstein, P.A., and Manfredi, G. (2016). Energy deficit in parvalbumin neurons leads to  
791 circuit dysfunction, impaired sensory gating and social disability. *Neurobiol. Dis.* *93*, 35–46.

792 Isokawa, M. (1997). Membrane time constant as a tool to assess cell degeneration. *Brain Res Brain*  
793 *Res Protoc* *1*, 114–116.

794 Janak, P.H., and Tye, K.M. (2015). From circuits to behaviour in the amygdala. *Nature* *517*, 284–  
795 292.

796 Jonas, P., Bischofberger, J., Fricker, D., and Miles, R. (2004). Interneuron Diversity series: Fast  
797 in, fast out--temporal and spatial signal processing in hippocampal interneurons. *Trends Neurosci.*



798 27, 30–40.

799 Kann, O. (2011). The energy demand of fast neuronal network oscillations: insights from brain  
800 slice preparations. *Front. Pharmacol.* 2, 90.

801 Kann, O. (2016). The interneuron energy hypothesis: Implications for brain disease. *Neurobiol.*  
802 *Dis.* 90, 75–85.

803 Kann, O., and Kovács, R. (2007). Mitochondria and neuronal activity. *Am. J. Physiol. Cell Physiol.*  
804 292, C641-57.

805 Kann, O., Huchzermeyer, C., Kovács, R., Wirtz, S., and Schuelke, M. (2011). Gamma oscillations  
806 in the hippocampus require high complex I gene expression and strong functional performance of  
807 mitochondria. *Brain* 134, 345–358.

808 Kann, O., Papageorgiou, I.E., and Draguhn, A. (2014). Highly energized inhibitory interneurons  
809 are a central element for information processing in cortical networks. *J. Cereb. Blood Flow Metab.*  
810 34, 1270–1282.

811 Kann, O., Hollnagel, J.-O., Elzoheiry, S., and Schneider, J. (2016). Energy and Potassium Ion  
812 Homeostasis during Gamma Oscillations. *Front. Mol. Neurosci.* 9, 47.

813 Kwon, S.-K., Sando, R., Lewis, T.L., Hirabayashi, Y., Maximov, A., and Polleux, F. (2016). LKB1  
814 Regulates Mitochondria-Dependent Presynaptic Calcium Clearance and Neurotransmitter Release  
815 Properties at Excitatory Synapses along Cortical Axons. *PLoS Biol.* 14, e1002516.

816 Lin-Hendel, E.G., McManus, M.J., Wallace, D.C., Anderson, S.A., and Golden, J.A. (2016).  
817 Differential Mitochondrial Requirements for Radially and Non-radially Migrating Cortical  
818 Neurons: Implications for Mitochondrial Disorders. *Cell Rep.* 15, 229–237.

819 Liu, Q.A., and Shio, H. (2008). Mitochondrial morphogenesis, dendrite development, and synapse  
820 formation in cerebellum require both Bcl-w and the glutamate receptor delta2. *PLoS Genet.* 4,

821 e1000097.

822 Longair, M.H., Baker, D.A., and Armstrong, J.D. (2011). Simple Neurite Tracer: open source  
823 software for reconstruction, visualization and analysis of neuronal processes. *Bioinformatics* 27,  
824 2453–2454.

825 López-Doménech, G., Higgs, N.F., Vaccaro, V., Roš, H., Arancibia-Cárcamo, I.L., MacAskill,  
826 A.F., and Kittler, J.T. (2016). Loss of Dendritic Complexity Precedes Neurodegeneration in a  
827 Mouse Model with Disrupted Mitochondrial Distribution in Mature Dendrites. *Cell Rep.* 17, 317–  
828 327.

829 López-Doménech, G., Covill-Cooke, C., Ivankovic, D., Halff, E.F., Sheehan, D.F., Norkett, R.,  
830 Birsa, N., and Kittler, J.T. (2018). Miro proteins coordinate microtubule- and actin-dependent  
831 mitochondrial transport and distribution. *EMBO J.* 37, 321–336.

832 MacAskill, A.F., and Kittler, J.T. (2010). Control of mitochondrial transport and localization in  
833 neurons. *Trends Cell Biol.* 20, 102–112.

834 Macaskill, A.F., Rinholm, J.E., Twelvetrees, A.E., Arancibia-Carcamo, I.L., Muir, J., Fransson,  
835 A., Aspenstrom, P., Attwell, D., and Kittler, J.T. (2009). Miro1 is a calcium sensor for glutamate  
836 receptor-dependent localization of mitochondria at synapses. *Neuron* 61, 541–555.

837 Madisen, L., Mao, T., Koch, H., Zhuo, J., Berenyi, A., Fujisawa, S., Hsu, Y.-W.A., Garcia, A.J.,  
838 Gu, X., Zanella, S., et al. (2012). A toolbox of Cre-dependent optogenetic transgenic mice for  
839 light-induced activation and silencing. *Nat. Neurosci.* 15, 793–802.

840 Mann, E.O., Suckling, J.M., Hajos, N., Greenfield, S.A., and Paulsen, O. (2005). Perisomatic  
841 feedback inhibition underlies cholinergically induced fast network oscillations in the rat  
842 hippocampus in vitro. *Neuron* 45, 105–117.

843 Marín, O. (2012). Interneuron dysfunction in psychiatric disorders. *Nat. Rev. Neurosci.* 13, 107–

844 120.

845 Meijering, E., Dzyubachyk, O., and Smal, I. (2012). Methods for cell and particle tracking. *Meth.*  
846 *Enzymol.* *504*, 183–200.

847 Montgomery, S.M., and Buzsáki, G. (2007). Gamma oscillations dynamically couple hippocampal  
848 CA3 and CA1 regions during memory task performance. *Proc. Natl. Acad. Sci. USA* *104*, 14495–  
849 14500.

850 Morris, R.L., and Hollenbeck, P.J. (1995). Axonal transport of mitochondria along microtubules  
851 and F-actin in living vertebrate neurons. *J. Cell Biol.* *131*, 1315–1326.

852 Motulsky, H.J., and Brown, R.E. (2006). Detecting outliers when fitting data with nonlinear  
853 regression - a new method based on robust nonlinear regression and the false discovery rate. *BMC*  
854 *Bioinformatics* *7*, 123.

855 Myatt, D.R., Hadlington, T., Ascoli, G.A., and Nasuto, S.J. (2012). Neuromantic - from semi-  
856 manual to semi-automatic reconstruction of neuron morphology. *Front Neuroinformatics* *6*, 4.

857 Nguyen, T.T., Oh, S.S., Weaver, D., Lewandowska, A., Maxfield, D., Schuler, M.-H., Smith, N.K.,  
858 Macfarlane, J., Saunders, G., Palmer, C.A., et al. (2014). Loss of Miro1-directed mitochondrial  
859 movement results in a novel murine model for neuron disease. *Proc. Natl. Acad. Sci. USA* *111*,  
860 E3631-40.

861 Nie, F., and Wong-Riley, M.T. (1995). Double labeling of GABA and cytochrome oxidase in the  
862 macaque visual cortex: quantitative EM analysis. *J. Comp. Neurol.* *356*, 115–131.

863 Okaty, B.W., Miller, M.N., Sugino, K., Hempel, C.M., and Nelson, S.B. (2009). Transcriptional  
864 and electrophysiological maturation of neocortical fast-spiking GABAergic interneurons. *J.*  
865 *Neurosci.* *29*, 7040–7052.

866 Pathak, D., Shields, L.Y., Mendelsohn, B.A., Haddad, D., Lin, W., Gerencser, A.A., Kim, H.,

867 Brand, M.D., Edwards, R.H., and Nakamura, K. (2015). The role of mitochondrially derived ATP  
868 in synaptic vesicle recycling. *J. Biol. Chem.* *290*, 22325–22336.

869 Paul, A., Crow, M., Raudales, R., He, M., Gillis, J., and Huang, Z.J. (2017). Transcriptional  
870 architecture of synaptic communication delineates gabaergic neuron identity. *Cell* *171*, 522–  
871 539.e20.

872 Pelkey, K.A., Chittajallu, R., Craig, M.T., Tricoire, L., Wester, J.C., and McBain, C.J. (2017).  
873 Hippocampal gabaergic inhibitory interneurons. *Physiol. Rev.* *97*, 1619–1747.

874 Pham, A.H., McCaffery, J.M., and Chan, D.C. (2012). Mouse lines with photo-activatable  
875 mitochondria to study mitochondrial dynamics. *Genesis* *50*, 833–843.

876 del Río, J.A., de Lecea, L., Ferrer, I., and Soriano, E. (1994). The development of parvalbumin-  
877 immunoreactivity in the neocortex of the mouse. *Brain Res. Dev. Brain Res.* *81*, 247–259.

878 Rodriguez, A., Zhang, H., Klaminder, J., Brodin, T., Andersson, P.L., and Andersson, M. (2017).  
879 ToxTrac : A fast and robust software for tracking organisms. *Methods in ecology and evolution /*  
880 *British Ecological Society.* doi: 10.1111/2041-210X.12874.

881 Russo, G.J., Louie, K., Wellington, A., Macleod, G.T., Hu, F., Panchumarthi, S., and Zinsmaier,  
882 K.E. (2009). *Drosophila* Miro is required for both anterograde and retrograde axonal mitochondrial  
883 transport. *J. Neurosci.* *29*, 5443–5455.

884 Sainath, R., Ketschek, A., Grandi, L., and Gallo, G. (2017). CSPGs inhibit axon branching by  
885 impairing mitochondria-dependent regulation of actin dynamics and axonal translation. *Dev.*  
886 *Neurobiol.* *77*, 454–473.

887 Saotome, M., Safiulina, D., Szabadkai, G., Das, S., Fransson, A., Aspenstrom, P., Rizzuto, R., and  
888 Hajnóczky, G. (2008). Bidirectional Ca<sup>2+</sup>-dependent control of mitochondrial dynamics by the  
889 Miro GTPase. *Proc. Natl. Acad. Sci. USA* *105*, 20728–20733.

890 Seibenhener, M.L., and Wooten, M.C. (2015). Use of the Open Field Maze to measure locomotor  
891 and anxiety-like behavior in mice. *J. Vis. Exp.* e52434.

892 Shlevkov, E., Basu, H., Bray, M.-A., Sun, Z., Wei, W., Apaydin, K., Karhohs, K., Chen, P.-F.,  
893 Smith, J.L.M., Wiskow, O., et al. (2019). A High-Content Screen Identifies TPP1 and Aurora B  
894 as Regulators of Axonal Mitochondrial Transport. *Cell Rep.* 28, 3224–3237.e5.

895 Smith, G.M., and Gallo, G. (2018). The role of mitochondria in axon development and  
896 regeneration. *Dev. Neurobiol.* 78, 221–237.

897 Smith, H.L., Bourne, J.N., Cao, G., Chirillo, M.A., Ostroff, L.E., Watson, D.J., and Harris, K.M.  
898 (2016). Mitochondrial support of persistent presynaptic vesicle mobilization with age-dependent  
899 synaptic growth after LTP. *Elife* 5. eLife, 5. doi: 10.7554/eLife.15275.

900 Sohal, V.S. (2016). How close are we to understanding what (if anything)  $\gamma$  oscillations do in  
901 cortical circuits? *J. Neurosci.* 36, 10489–10495.

902 Sohal, V.S., Zhang, F., Yizhar, O., and Deisseroth, K. (2009). Parvalbumin neurons and gamma  
903 rhythms enhance cortical circuit performance. *Nature* 459, 698–702.

904 Spillane, M., Ketschek, A., Merianda, T.T., Twiss, J.L., and Gallo, G. (2013). Mitochondria  
905 coordinate sites of axon branching through localized intra-axonal protein synthesis. *Cell Rep.* 5,  
906 1564–1575.

907 Stephen, T.-L., Higgs, N.F., Sheehan, D.F., Al Awabdh, S., López-Doménech, G., Arancibia-  
908 Carcamo, I.L., and Kittler, J.T. (2015). Miro1 Regulates Activity-Driven Positioning of  
909 Mitochondria within Astrocytic Processes Apposed to Synapses to Regulate Intracellular Calcium  
910 Signaling. *J. Neurosci.* 35, 15996–16011.

911 Stoppini, L., Buchs, P.A., and Muller, D. (1991). A simple method for organotypic cultures of  
912 nervous tissue. *J. Neurosci. Methods* 37, 173–182.

913 Sun, T., Qiao, H., Pan, P.-Y., Chen, Y., and Sheng, Z.-H. (2013). Motile axonal mitochondria  
914 contribute to the variability of presynaptic strength. *Cell Rep.* *4*, 413–419.

915 Swietek, B., Gupta, A., Proddutur, A., and Santhakumar, V. (2016). Immunostaining of  
916 Biocytin-filled and Processed Sections for Neurochemical Markers. *J. Vis. Exp.* doi:  
917 10.3791/54880

918 Vaccaro, V., Devine, M.J., Higgs, N.F., and Kittler, J.T. (2017). Miro1-dependent mitochondrial  
919 positioning drives the rescaling of presynaptic Ca<sup>2+</sup> signals during homeostatic plasticity. *EMBO*  
920 *Rep.* *18*, 231–240.

921 Wang, X., and Schwarz, T.L. (2009). The mechanism of Ca<sup>2+</sup> -dependent regulation of kinesin-  
922 mediated mitochondrial motility. *Cell* *136*, 163–174.

923 Whittaker, R.G., Turnbull, D.M., Whittington, M.A., and Cunningham, M.O. (2011). Impaired  
924 mitochondrial function abolishes gamma oscillations in the hippocampus through an effect on fast-  
925 spiking interneurons. *Brain* *134*, e180

926 Zou, D., Chen, L., Deng, D., Jiang, D., Dong, F., McSweeney, C., Zhou, Y., Liu, L., Chen, G.,  
927 Wu, Y., et al. (2016). DREADD in parvalbumin interneurons of the dentate gyrus modulates  
928 anxiety, social interaction and memory extinction. *Curr. Mol. Med.* *16*, 91–102.

929

930

931

932

933

934

935

## 936 **EXPERIMENTAL MODEL**

### 937 **Animals**

938 All experimental procedures were carried out in accordance with institutional animal welfare  
939 guidelines and licensed by the UK Home Office in accordance with the Animals (Scientific  
940 Procedures) Act 1986. Animals were maintained under controlled conditions (temperature  $20 \pm$   
941  $2^\circ\text{C}$ ; 12-hour light-dark cycle). Animals of either sex were used for all experiments. The PV<sup>Cre</sup>  
942 line (Stock Number 008069) has been previously described in (Hippenmeyer et al., 2005). The  
943 *Rhot1* transgenic line (*Rhot1tm1a* (EUCOMM)Wtsi) was obtained from the Wellcome Trust  
944 Sanger Institute (MBTN EPD0066 2 F01) and the floxed mouse has been previously generated  
945 using the Flp recombination strategy described here (López-Doménech et al., 2016). Briefly, the  
946 exon 2 of *Rhot1* gene (chromosome 11) is flanked by two LoxP sites and Cre recombination results  
947 in the deletion of exon 2. The stop-floxed MitoDendra line (*B6*; 129S  
948 *Gt(ROSA)26Sortm1(CAGCOX8A/Dendra2)Dcc/J*) (Stock number 018385) and the stop-floxed  
949 ChR2- EYFP (*B6*;129S*Gt(ROSA)26Sortm32(CAGCOP4\*H134R/EYFP)Hze/J*) (Stock number  
950 012569) were also obtained from The Jackson Laboratory. The MitoDendra line has been  
951 previously described in (Pham et al., 2012) and the ChR2-EYFP line in (Madisen et al., 2012).  
952 Experimental animals were generated as a result of the following crosses: PV<sup>Cre+/-</sup> *Rhot1*<sup>fl/fl</sup> x PV<sup>Cre-</sup>  
953 <sup>-/-</sup> *Rhot1*<sup>fl/fl</sup>, PV<sup>Cre+/+</sup> *Rhot1*<sup>+/+</sup> MitoDendra<sup>+/+</sup> x PV<sup>Cre+/+</sup> *Rhot1*<sup>+/+</sup> MitoDendra<sup>+/+</sup>, PV<sup>Cre+/+</sup> *Rhot1*<sup>+/fl</sup>  
954 MitoDendra<sup>+/+</sup> x PV<sup>Cre+/+</sup> *Rhot1*<sup>fl/fl</sup> MitoDendra<sup>+/+</sup> and PV<sup>Cre+/+</sup> *Rhot1*<sup>+/fl</sup> ChR2-EYFP<sup>+/+</sup> x PV<sup>Cre+/+</sup>  
955 *Rhot1*<sup>+/fl</sup> ChR2-EYFP<sup>+/+</sup>. Genotyping was carried out following Sanger recommended procedures  
956 on ear biopsies for adult mice and tail biopsies for neonatal mice (<P10).

957

958

## 959 **METHOD DETAILS**

### 960 **Hippocampal Brain Slice Preparations**

961 Acute brain slices. Adult mice (>P60) were anesthetized using 4% isoflurane followed by  
962 decapitation, and the brains were extracted in warm (30-35°C) sucrose solution [40 mM NaCl, 3  
963 mM KCL, 7.4 mM MgSO<sub>4</sub>·7H<sub>2</sub>O, 150 mM sucrose, 1 mM CaCl<sub>2</sub>, 1.25 mM NaH<sub>2</sub>PO<sub>4</sub>, 25 mM  
964 NaHCO<sub>3</sub> and 15 mM glucose; Osmolality 300 ± 10 mOsmol/Kg]. Horizontal hippocampal slices  
965 (350 µm thick) were cut using a vibratome (Leica VT1200S) and were placed in an interface  
966 chamber containing warm artificial cerebrospinal fluid (aCSF) [126 mM NaCl, 3.5 mM KCl, 2  
967 mM MgSO<sub>4</sub>·7H<sub>2</sub>O, 1.25 mM NaH<sub>2</sub>PO<sub>4</sub>, 24 mM NaHCO<sub>3</sub>, 2 mM CaCl<sub>2</sub> and 10 mM glucose;  
968 Osmolality 300 ± 10 mOsmol/Kg]. All solutions were bubbled with carbogen gas [95% O<sub>2</sub>/ 5%  
969 CO<sub>2</sub>].

970

971 Organotypic brain slices. Neonatal mice (P6-8) were sacrificed by cervical dislocation followed  
972 by decapitation. The brains were extracted in ice-cold dissection medium [487.5 ml Earle's  
973 Balanced Salt Solution (EBSS) and 12.5 ml of 25 mM HEPES]. 300 µm thick transverse  
974 hippocampal slices were cut using a vibratome (Leica VT1200S) in ice-cold dissection medium.  
975 Organotypic slices were prepared using the Stoppini interface method as described in (De Simoni  
976 and Yu, 2006; Stephen et al., 2015; Stoppini et al., 1991). Briefly, the slices were kept on sterile  
977 0.45 µm Omnipore membrane inserts (Millipore, cat no. FHLC01300) in an incubator (37°C, 95%  
978 O<sub>2</sub>/ 5% CO<sub>2</sub>) for at least 6 days in culture media [47% MEM + GlutaMAX, 25% horse serum,  
979 25% EBSS supplemented with 20 mM HEPES, 1.44% of 45% glucose, 1.06%  
980 penicillin/streptomycin with 16% nystatin, and 0.5% 1 M Tris solution] prior to imaging. The



981 media were changed on the day of slicing and half of the media were replaced with fresh media  
982 every 3-4 days.

983

## 984 **Microscopy**

985 Fixed Confocal Imaging. Confocal images (1024 x 1024) were acquired on a Zeiss LSM700  
986 upright confocal microscope using the 10x air, 20x water and 63x oil objective and digitally  
987 captured using the default LSM acquisition software. For analysis, 2-3 zoomed regions of the  
988 hippocampus were imaged with the 2x zoom. For the quantification, these regions were averaged  
989 and represented as one value. Acquisition settings and laser power were kept constant within  
990 experiments. For neuronal reconstructions, ~150  $\mu\text{m}$  thick confocal stacks were captured using  
991 the 20x objective, with z-steps of 1  $\mu\text{m}$ .

992

993 Live Two-photon Imaging. Organotypic slices were live-imaged using the 20x and 60x water  
994 objectives on a Zeiss LSM700 upright two photon microscope equipped with a MaiTai Ti:Sapphire  
995 Laser (Spectra-Physics). The slices were transferred to a recording chamber, perfused with aCSF  
996 [2 mM  $\text{CaCl}_2$ , 2.5 mM  $\text{KCl}$ , 1 mM  $\text{MgCl}_2$ , 10 mM D-glucose, 126 mM  $\text{NaCl}$ , 24 mM  $\text{NaHCO}_3$ , 1  
997 mM  $\text{NaH}_2\text{PO}_4$ ] bubbled with carbogen gas and heated between 35-38°C at a constant perfusion  
998 (~2 ml/min). The excitation wavelength was set at 900nm and the rate of image acquisition was 1  
999 frame / 5 seconds for 500 seconds (100 frames per movie).

1000

## 1001 **Tissue Processing and Labeling**

1002 Brain Harvesting. Adult animals (>P60) were sacrificed by cervical dislocation or  $\text{CO}_2$  exposure.  
1003 The brains were dropped-fixed in 4% paraformaldehyde (PFA) in sucrose solution overnight at

1004 4°C. The brains were then cryo-protected in 30% sucrose/1X Phosphate Buffered Saline (PBS)  
1005 [1.37 mM NaCl, 2.7 mM KCl, 10 mM Na<sub>2</sub>HPO<sub>4</sub>, 2 mM KH<sub>2</sub>PO<sub>4</sub>] solution overnight at 4°C before  
1006 freezing at -80°C. Hemi-floxed and conditional knock-out animals expressing the MitoDendra  
1007 fluorophore were anaesthetized with isoflurane and transcardially perfused with ice-cold 4% PFA  
1008 to maintain mitochondrial morphology. The frozen brains were embedded in tissue freezing  
1009 compound (OCT) and 30 µm coronal brain slices were serially cryosected using a Cryostat (Bright  
1010 Instruments). After live-imaging and electrophysiological recordings, brain slices were fixed in  
1011 4% PFA/sucrose solution overnight at 4°C. Slices were either kept in PBS at 4°C for short-term  
1012 storage or at -20°C in cryoprotectant solution [30% glycerol, 30% ethylene glycol, 40% 1X PBS]  
1013 for long-term storage.

1014

1015 *Immunohistochemistry.* Free floating sections were washed with 1X PBS and permeabilized for 4-  
1016 5 hours in block solution [1X PBS, 10% horse serum supplemented with 0.02% sodium azide, 3%  
1017 (w/v) Bovine Serum Albumin (BSA), 0.5% Triton X-100 and 0.2 M glycine]. The slices were  
1018 further blocked overnight with an added purified goat anti-mouse Fab-fragment (50 µg/ml, Jackson  
1019 Immunoresearch) for reducing endogenous background. The sections were then incubated with  
1020 primary antibody diluted in block solution overnight at 4°C. The following primary antibodies  
1021 were used: parvalbumin (mouse, 1:500, Millipore MAB1572), COX-IV (rabbit, 1:500, Abcam  
1022 ab16056) and Rhot1 (rabbit, 1:100, Atlas HPA010687). Slices were washed 4-5 times in 1X PBS  
1023 over 2 hours and then incubated for 3-4 hours with secondary antibody in block solution (1:500-  
1024 1:1000) at room temperature. The secondary antibodies used were the donkey anti-mouse Alexa  
1025 Fluor 488 (Jackson ImmunoResearch 715-545-151), goat anti-rabbit Alexa Fluor 555 (Thermo  
1026 Fisher Scientific A-21430) and donkey anti-rabbit Alexa Fluor 568 (Thermo Fisher Scientific A-

1027 10042). The slices were then washed 4-5 times in PBS for 2 hours and mounted onto glass slides  
1028 using Mowiol mounting media.

1029

1030 Biocytin Labeling. Biocytin-filled slices were fixed in 4% PFA solution after intracellular  
1031 recordings and kept overnight at 4°C. The slices were washed with 1X PBS 3-4 times and  
1032 permeabilized with 0.3%-Triton 1X PBS for 4-5 hours. Streptavidin conjugated to Alexa Fluor  
1033 555 (Invitrogen S32355) in PBS-T 0.3% (1:500) was added and the slices were kept overnight at  
1034 4°C. The slices were then washed 4-5 times in 1X PBS over 2 hours. The slices were placed on  
1035 glass slides and a coverslip was mounted on top using Dako Fluorescent mounting medium.

1036

### 1037 **Image Analysis**

1038 Mitochondrial Trafficking. The image sequences were subjected to alignment (stackreg) if  
1039 necessary, background subtraction (rolling ball radius = 50 pixels) and filtering (smooth filter).  
1040 Moving mitochondria were visually identified. Mitochondria were manually tracked between each  
1041 frame using MTrackJ (Meijering et al., 2012) on Fiji, which provided track statistics.  
1042 Mitochondrial movement was usually accompanied by brief periods of immobility so data were  
1043 omitted from the velocity ( $\mu\text{m}\cdot\text{s}^{-1}$ ) calculations when a mitochondrion was immobile for a period  
1044 longer than 10 seconds. Mitochondria were considered mobile if the distance covered was longer  
1045 than 2  $\mu\text{m}$  in 5 minutes.

1046

1047 Fluorescent Intensity. The fluorescence intensities of COX-IV and *Rhot1* were quantified on Fiji.  
1048 The signal from the parvalbumin channel was thresholded using the default settings, the  
1049 parvalbumin cell body was selected using the wand tool and a mask was generated that was then

1050 superimposed on the channels of interest to selectively record the fluorescent signal within the  
1051 masked region.

1052

1053 Neuronal Reconstruction. The biocytin signal in acute brain slices was used to manually  
1054 reconstruct parvalbumin interneurons in Neuromantic (Myatt et al., 2012) and generate .SWC files  
1055 for further analysis.

1056

1057 Sholl Analysis. 3D Sholl analysis was performed on the .SWC file using the Matlab script  
1058 described in (Madry et al. 2018). To perform the 3D-MitoSholl, the volume of the .SWC file was  
1059 filled out and a stack-mask was generated in the Simple Neurite Tracer Plugin on Fiji (Longair et  
1060 al., 2011). To isolate mitochondria selectively in parvalbumin interneurons, the background was  
1061 subtracted (rolling ball radius = 50 pixel) and the median filter was applied prior to binarization.  
1062 The stack of the mitochondrial distribution in individual cells was generated by adding the stack-  
1063 mask to the mitochondrial channel using the “AND” function of the Image Calculator in Fiji. 3D-  
1064 MitoSholl analysis was performed using a custom Matlab script which quantified the number of  
1065 MitoDendra pixels within each sholl ring, radiating out from the soma at 1  $\mu\text{m}$  intervals.

1066

1067 Proximity Analysis. High magnification confocal stacks of the parvalbumin interneuron axon were  
1068 acquired from 350  $\mu\text{m}$  slices for calculating the minimum distance between mitochondria and  
1069 boutons/branch points. The minimum distance between the boutons and the mitochondria was  
1070 measured on max-projected images. The biocytin signal was used as a mask to isolate  
1071 mitochondria in the axon only. The mitochondrial image was binarized using the default method.  
1072 The (x,y) coordinates of the boutons were manually specified and the minimum distance between

1073 the bouton coordinates and the closest mitochondrion was calculated using a custom Matlab script,  
1074 which calculated the Euclidean distance between the x and y coordinates and the first encountered  
1075 binary pixel. The minimum distance between branch points and mitochondria was performed on  
1076 3D confocal stacks. The mitochondrial confocal stack was binarised using the default method).  
1077 The (x,y,z) coordinates of the branch points were specified and the minimum distance between the  
1078 branch points coordinates and the closest mitochondrion was calculated using a custom Matlab  
1079 script, which calculated the Euclidean distance between the x,y,z coordinates and the first pixel  
1080 encountered.

1081

## 1082 **Electrophysiology**

1083 Extracellular Recordings. Local field potentials (LFPs) were recorded in an interface recording  
1084 chamber as described in (Antonoudiou et al., 2020). Briefly, an extracellular borosilicate glass  
1085 electrode (tip resistance 1-5 M $\Omega$ ) was filled with aCSF [126 mM NaCl, 3.5 mM KCl, 2 mM  
1086 MgSO<sub>4</sub>·7H<sub>2</sub>O, 1.25 mM NaH<sub>2</sub>PO<sub>4</sub>, 24 mM NaHCO<sub>3</sub>, 2 mM CaCl<sub>2</sub> and 10 mM glucose;  
1087 Osmolality 300  $\pm$  10 mOsmol/Kg] and was placed in hippocampal area CA3.  $\gamma$ -oscillations (20-  
1088 80Hz) were induced by perfusion of carbachol (5  $\mu$ M) in carbogen-bubbled aCSF. Data were  
1089 acquired using 10 kHz sampling rate and amplified x10 by Axoclamp 2A (Molecular Devices).  
1090 The signal was further amplified x100 and low-pass filtered at 1kHz (LPBF-48DG, NPI  
1091 Electronic). The signal was digitized at 5 kHz by a data acquisition board (ITC-16, InstruTECH)  
1092 and recorded on Igor Pro 6.3 software (Wavemetrics).

1093

1094 Intracellular Recordings. Intracellular recordings were performed in a submerged chamber (32-  
1095 33°C) using borosilicate glass pipettes (5-12 M $\Omega$ ). Data were acquired through the MultiClamp

1096 700B amplifier (Molecular Devices) and digitized at 10 kHz (ITC-18, InstruTECH). Acquisition  
1097 of electrophysiological signals was performed using Igor Pro 6.3 (Wavemetrics). The signals were  
1098 low-pass filtered at 10 kHz and 3 kHz for current-clamp and voltage-clamp, respectively. For  
1099 optogenetic experiments, filtered white LED ( $460 \pm 30$  nm, THOR labs) was delivered via epi-  
1100 illumination through a 60x objective and was used to activate Chr2. For whole cell current clamp  
1101 recordings, pipettes were filled with internal solution [110 mM K-Gluconate, 40 mM HEPES, 2  
1102 mM ATP-Mg, 0.3 mM GTP-NaCl, 4 mM NaCl, 3-4 mg/ml biocytin (Sigma); pH~7.2; Osmolality  
1103 270-290 mOsmol/Kg]. After break through, the bridge balance was adjusted to compensate for  
1104 electrode access. Hyperpolarizing and depolarizing square current pulses were applied in order to  
1105 quantify intrinsic properties of the recorded neuron. sEPSCs on parvalbumin interneurons were  
1106 recorded in voltage clamp mode at -70 mV, using the current clamp internal solution. IPSCs on  
1107 pyramidal cells were recorded in voltage clamp mode with pipettes filled with internal solution  
1108 [137 mM CsCl, 5 mM NaCl, 10 mM HEPES, 0.1 mM EGTA, 2 mM ATP-Mg, 0.3 mM GTP-Na,  
1109 3-4 mg/ml biocytin]. These experiments were done on two batches of animals. For evoked  
1110 inhibitory post-synaptic currents (eIPSCs) the cells were held at -40 mV. This was to prevent  
1111 spiking during light illumination in the absence of QX-314. In the second set of recordings, 5 mM  
1112 QX-314 was added and the voltage was still held at -40 mV. The recordings between the first and  
1113 second batches were comparable and therefore pooled together and quantified as one dataset. For  
1114 optogenetic experiments, aCSF was supplemented with 3 mM kynurenic acid. After breakthrough  
1115 the cell and electrode capacitance were compensated in Multiclamp. Series resistance (RS)  
1116 compensation was performed to 65%. For optogenetic experiments, a power plot using increasing  
1117 light intensities was generated to decide the level of LED voltage to be used. The LED voltage that

1118 elicited 90% of the maximal response was used for stimulations. The LED output range used for  
1119 power plot was between 0-1.53 mW.

1120

1121 Electrophysiological Analysis. In order to characterize and analyze the  $\gamma$ -oscillations, we  
1122 calculated power spectra as the normalized magnitude square of the FFT (Igor Pro 6.3). The 50 Hz  
1123 frequency was not included in the analysis to exclude the mains noise. The oscillation amplitude  
1124 was quantified by measuring the peak of the power spectrum (peak power) and the area below the  
1125 power spectrum plot (power area) within the  $\gamma$ -band range (20-80 Hz). The peak frequency of the  
1126 oscillation was the frequency at which the peak of the power spectrum occurred in the  $\gamma$ -band  
1127 range. For testing rhythmicity, autocorrelation was computed in Igor Pro 6.3. The peak power,  
1128 power area and peak frequency were calculated for a period of 300 seconds and compared between  
1129 control, hemi-floxed and cKO mice. The power spectra were also calculated over a period of 300  
1130 seconds and a gaussian curve fit was performed using Igor Pro 6.3. This was done in order to  
1131 assess the width of the power spectrum distribution. For spontaneous post-synaptic current (sPSC)  
1132 detection, custom written procedures were used in Igor Pro 6.3. The traces were first low-pass  
1133 filtered at 1 kHz. sPSCs were first detected using an initial threshold of 3 pA. The detected events  
1134 that were smaller than 5x standard deviation of noise were excluded from further analysis. The  
1135 traces were then visually inspected for correct peak identification. The traces were averaged, and  
1136 the median inter-event interval and peak amplitude were obtained for each cell. For the recovery  
1137 experiments, the percentage of recovery was normalized to the amplitude of the first peak in the  
1138 train, for every train and was presented as an average of the 10 trains.

1139

1140

1141 **Animal Behavior Testing**

1142 Nesting Assessment. The assessment husbandry behavior using Nestlets was performed as described  
1143 in (Deacon, 2006). Briefly, one hour before the dark cycle, mice were transferred in single cages  
1144 containing wood-chip bedding but no other environmental enrichment. One Nestlet (5 x 5 cm) was  
1145 placed in each cage. The following morning the shredded and unshredded Nestlets were collected  
1146 and weighted.

1147

1148 Open field. The open field apparatus consisted of a 45 x 45 x 45 cm box open at the top. Mice were  
1149 placed in the center of the arena and were recorded for 10 minutes via a ceiling-fixed video camera.  
1150 The movies were analyzed using ToxTrac, an automated open-source executable software  
1151 (Rodriguez et al., 2017). Detection settings were set to 10 for threshold, 100 for minimum object  
1152 size and 1000 for maximum object size and the default tracking settings were used.

1153

1154 Rotarod. The assessment of motor coordination and learning was performed similar to (Deacon,  
1155 2013). Briefly, mice were placed on a revolving rotarod treadmill (Med Associates) with a starting  
1156 speed of 4 revolutions per minute (RPM) and an acceleration rate of about 7 RPM/min. Each  
1157 mouse was subjected to a 5 minute trial, repeated 2 more times after a 10 minute gap. To calculate  
1158 the RPM, we recorded the speed at which the mouse fell from the revolving rod using this formula:  
1159 
$$\text{RPM} = [(\text{End Speed} - \text{Start Speed}) / 300] \times (\text{Seconds Run}) + \text{Start Speed}.$$

1160

1161 T-Maze. The assessment of spontaneous alternation on the T-maze was performed according to  
1162 (Deacon and Rawlins, 2006). The T-maze apparatus consisted of three arms with 27 x 7 x 10cm  
1163 dimensions. A set of three sliding guillotine doors was used to separate the entrance of each arm.



1164 At the beginning of the experiment all of the doors were raised, except for the one located in front  
1165 of the starting point. Each mouse was allowed 8 consecutive trials. Each trial consisted of  
1166 individually placing each animal at the entrance of the main arm and allowing it to freely run and  
1167 chose an arm. After the mouse entered an arm, the guillotine door was pushed down and the animal  
1168 was confined in the chosen arm for 30 seconds. The mouse was then placed in the starting point  
1169 for 30 seconds before the beginning of the next trial. Each trial lasted less than 90 seconds. When  
1170 a mouse did not choose an arm within 90 seconds it was considered as a NO-GO and the trial was  
1171 restarted. Animals were excluded from the quantification when there were more than 3 NO-GOs.

1172

1173 *Elevated Plus Maze.* The elevated plus maze was placed 40 cm above the ground and consisted of  
1174 four 30 x 5 cm arms, two of which were surrounded by additional 15 cm high walls. Mice were  
1175 placed on the boundary between the open arm and the center, facing the center. Mice were recorded  
1176 for 5 minutes by a ceiling-fixed video camera and the movies were analyzed using ToxTrac  
1177 (Rodriguez et al., 2017).

1178

### 1179 **Statistical Analysis and Blinding**

1180 Statistical analysis was performed in Prism 6, Excel and Igor Pro. Datasets were tested for fitting  
1181 in a Gaussian distribution using the D'Agostino-Pearson omnibus and the Shapiro-Wilk normality  
1182 test. When the distribution was normal, unpaired t-test was performed. The F-test was used to  
1183 compare variances. When the variance was significantly different, the unpaired t-test with Welch's  
1184 correction was performed. For cumulative distributions, the Kolmogorov-Smirnov (KS) test and  
1185 multiple t-test per row were performed. For non-normally distributed data, the Mann-Whitney  
1186 (MW) test was applied. For comparing multiple groups, ordinary one-way ANOVA and Tukey's

1187 multiple comparisons test with a single pooled variance were used. Statistical outliers were  
1188 identified using the ROUT method and removed (Motulsky and Brown, 2006). Significance of  $p$   
1189  $< 0.05$  is represented as \*,  $p < 0.01$  as \*\*,  $p < 0.001$  as \*\*\* and  $p < 0.0001$  as \*\*\*\*. The errors in  
1190 all bar charts represent the standard error of the mean (sem). Brain tissue processing, staining,  
1191 acquisition and analysis were performed blinded. Live imaging acquisition and analysis were  
1192 performed blinded for littermate hemi-floxed and conditional knock-out animals.  
1193 Electrophysiological recording analysis was performed blinded.
